# Supplementary material
Source: PubMed Central journal article supplement (PMC8404143)
Supplement: NIHMS1730011-supplement-1.pdf [file NIHMS1730011-supplement-1.pdf]

**Supplementary Data 1: Graphic representation of the data mining process to inventory *pgbd* genes and their closest *pble* relatives.**

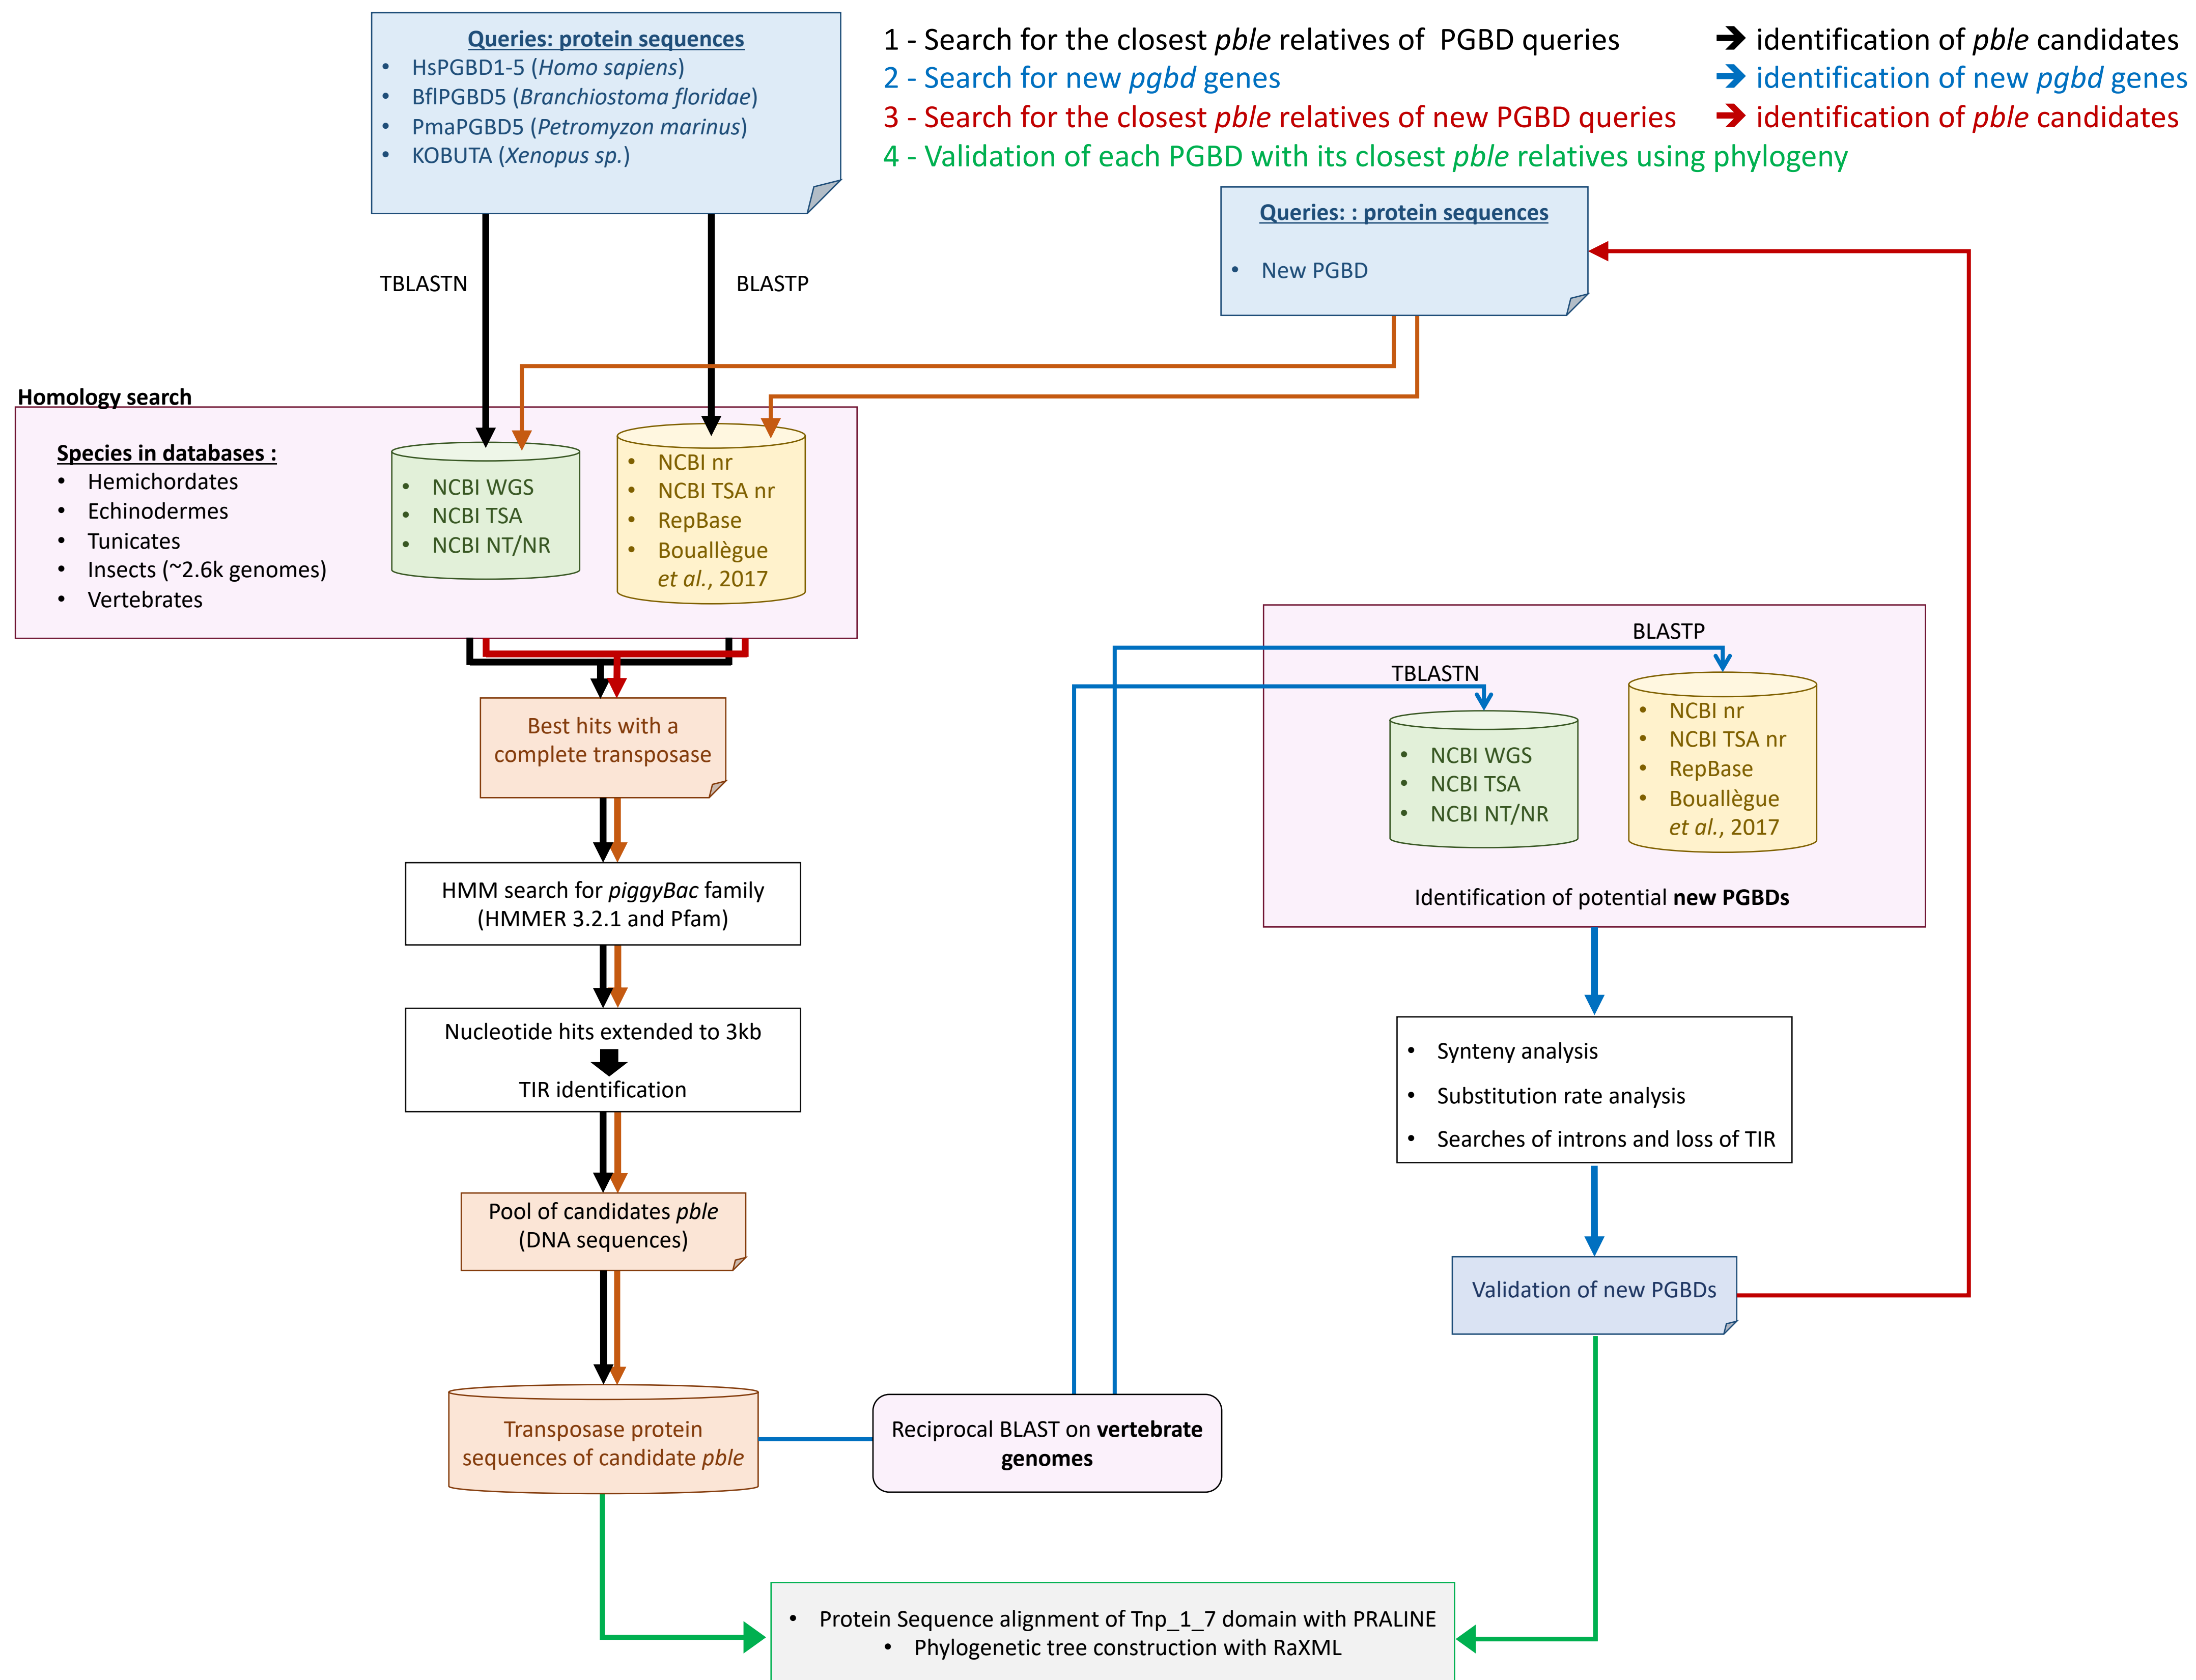

**Supplementary data 2. : Localization of PGBD3 and PGBD4 ORFs and respectively MER85 and MER75.**

Fasta sequences of localization of PGBD3 and PGBD4 genes. PGBD3 sequence is reversed (complementary strand). ORF of genes is underlined in green and TIR of the element are in bold. For PGBD3, the first bold sequence corresponds to position 1 to 43 of MER85 and the second to the positions 39 to 140. For PGBD4, the first sequence is for positions 68 to 341 of MER75 and the second one is the positions 379 to 514. TSD were not identified for MER75.

>NC\_000010.11:49515105-49524281 Homo sapiens chromosome 10, GRCh38.p13 Primary Assembly (PGBD3)

ACATCTTTAA**CCCATTTATGTC**TGAGGTT**CAATTTTTTTGAATTTTTGCATGA**AATTCATATATGTTACC  
TAGAAAAATTCAGGAACAAAAATTTGAAGAGAAAAAATTTATTATGTTCCATTGTTATGTGACGTT  
CCAAAATTTGGAACACTAGGCAAAACCCTGCTACACTGTACATAATGTATAAAACTATGTTTCTTATCTC  
AGGAGGTGGTGACACCTG**CTATTCAGTGTGATATTCACCGAACACTTCACATGTAAGGCAACATCACAT**  
**TTTTACATCGAAAAGTTGTGTTCTTATGACATTCAGCGCATCGCGTTTGCTTTCCCTGTTTGACTATCA**  
**CATGATTTATGCCATCATAACGTGAGTCAATGTTACGCTTCTGAGGTCTTCTTTTTGGCCAGGTTCTGG**  
**AGGATGACCATGGGTCTCCAGATAATGGCATAACCACACGTCGACGAACTCCAGAAAATCCACTGGTTTC**  
**TCATCATATGTTTTATGCAATTGCCAAGCATTGTAAGACCAGTTCGAAACAGAACAAAAGAGGGCTTG**  
**AATACCATTTCTTCCACGGATTGATGCCGATACTTATCAATGTTTTCATCAGCTCTGTCTACGCCTCC**  
**CATGAACTGGTTATACACTTTGATCATGTTGGCTGCTGAACTTGTATCTTCTTTTTCAGTTTCTGGGAG**  
**TAACGACTGACAAGACACAGGGGATGGATAACCAGCACCAGATGAGGCAACAGTGACAACACTGTTATCAT**  
**TCCATCTGCAGACAATATTGCCCTTTGCCATCAATTCGATAATCAAATGTGCCTCTTCTTTTTTCTTTAA**  
**AGCTACATCTGATTCAGTGGAACTCTGTCAATGTGATCCTTCTCACTGTACCTGTTGCCTGATGTCCC**  
**ATTGAACTGAGCTTATCAAGAAGTGCAATACTGGTGAAGAAAGTTATTGAATACAAAATGGTATTGTCCAG**  
**GGTGTGCCTCTGTAAGTGCCTCACTAAACTGAAGGACAAGTGACGCACCGACACCATATTCCTCATGTTT**  
**AGTATTTGGGTTTTTACCCTGATACGGCTGAAACCAGCAAATGTAGCCAGACAGGTGGCACCACACCAA**  
**AACTTATAGCCAAACCAGATGGCTTTCCCCGAATAAATGTTTGCACCCGTGACGACCAAAAATAAGGAA**  
**CCATGAATTCATCAAAGCTGAAATATGTTTCATTTGGAACAAATTCATGCATCTCTCATTAAGTTTGCT**  
**TATGAGAGGTCGCAATTTGAAAAATTTGTCCACTGGATCCAAATTTGCATTGTGCAACATGCAAAATTA**  
**GAAAAATAGTTTCAAACCGTCACTCTCATGGCAGCACTAACCAGTACATTATGCACATCTGTTCTTT**  
**GTTCCCAAAACATACGCCTTCTAGGAACTGAGACATAACCCTCAGAAAAATAATCCAGAAAAACATTT**  
**GAATTCAGAGCTAGTCAAGCCAAGATGTACACCTTACTGCAAGCATATAAGTTGGAGTACTTGACAATG**  
**AGTTCAATGACCTCGTCATCAAGAAAAGTTCAAGAATTTCTGTGGGAGTTCTCATTACGGTGAAGAAAT**  
**CGTTTGGTGGTGTGTAACCTTACCTGCTACGGGTTGTACAGTTAGGTCCGCTTTTTTCCATTTGCAAAG**  
**AATTTTTGTCATTTTCTCCTCCTTGATGGTGGAGGTTGCTGCACAGTAAACGTAGATGGAACCTTCATCA**  
**GGAGAGTCATCTTAGGTGCGTATGAGGGATCATCTGAGTCAGACTCAGCATCAGAGCCATCTTGAATAA**  
**GATACGCAGCTGTGTGCAACAAAGAACCTGGCAGATTATTTATTGTTCCACCTTCTTCATCTCCTGATTC**  
**CTCATCAGAAACAGGTGCTGTAGCATTTTCAAGGTGGTTGTATCACTATAGCACTTGCTTCTATGCTGTCA**  
**TCTGTCTCTAAAAGGTCAGTTATTTTCATGTAACCTTAGTGTTCGAGGCCAT**CTTGGGACTAAAACGGAAAA  
AAGGTATTTATAGTCCTAGTGGTAGTGGTTTTGCCTAGTGTCCAAAAATGGAACATGAAAAATGTCAAA  
CCCATAACTAATGCAATAATAATACTTTCTGTATTTTCTTTTTACCGCACAATAGCATAACTAGTAGAGA  
AGTTATTTCTTAAAAATTACTAGTATAGGATGTAGTGCAGTAAAGTTATATGTACCTGTCTTTGGATACT  
CAAAAATGTTTCTGAAAACCTCACATCACTTTTTGACAAGCTCCAGCATGCCAGTATCTGTAGCAGTAAC  
TAACCTCTGTGACCAAGTGATAACATGTACCCTCAGGAGGCAGAC**CATGTTGTAAAAATCAGACTTTGGCA**  
**ATGACCTTTGACCAAGTAGGCATGAATAAATCCACATGCTTAGCGTTCCAATAATGGAACACTAGGCATA**  
**AATAGGTTTTTAAAAGTGTAACTTTTTCTTTCAACTTATAGATTCCATAAAGAAAAATGAACACAGTCTTCT**  
**TTCTTTTTTTTTTTTTCTCTCAGGCTCCAGTGATCCACCCACCTCAGCCTCCTGGGTAGCTGGGACTACAG**  
**GCGCACATCACCACACCAGCTAACTTTTTCTATTTTTGGGGTTTACCATGTTGCCAGGCTGGTCTCG**  
**AACTCTTGAGCTCAAGCAATCCTCCTGCCTTGGCCTCCTAAAGTGTGGGATTACAGGTATGAGCCATTG**  
**TGCCCGCCAGGCTTATTTCTTGAGAAAAATGAACTCTCAGAGATGTTAAGAACATTCTTAAAAATAATTG**  
**TATTTAGGTTTCTGGATAAAATCTCAAACCTTTACTAAATTCAGATTTTGGGAGAGTTTTGTTTTTCTC**  
**TTTAATTTGGGCTTTAAAAAAAAGGCACAATCAAATCAACCTCCACATTGTGAGTTGGCCTTTGCCGAAG**  
**CACAGCTAAAATGCTAAATCCTCATCGGGTGCAAACCAGGATCCAACCTGAAGGACAGACAGGACAATC**  
**CCAGTGCAAACAGGTGCTAGACAGAAGGGAGAAGTTCCAGAAGACAATAAAATGGAGACAGGCTGTGAG**  
**GTGGTGGTTCTCAGGGCACTGCCTTTAGAAGCATTTCAAGGATAGGAATGGGACATTGGGTTGGAGTTGG**  
**CCCCATCAAGTGGAGGGAGAAACCAGGCACCTGAAACAATGCTTGTCCGAGTCTGCTGCAGCAAACCAAG**  
**CTGCGAGATCACTCTCATGTGTCCACACCACCTTCAGACCCCTTCTCCTTCTCCAAGCCCTTCCACTGA**  
**CTGCTGCCCTGAGCAAATGACTTCATCTCTCTGGGCTCAAAGTCTTATCTCCTGGGTGGCTGTAAGGATT**  
**AAACGAATTAACCTATATAACAAGAAGAACCACAAGAACCCTAAGTCGTACGCATTCAAACATGTGAGC**  
**CATCATTTGTTCTTGTGCACCCTCCCGCCCCGCCCCACCTCCACTTGATGCCACCTTTGCTCAGGCC**  
**TAAAGGCTGCAACGTTCCAAATCCACAAGACTCTTTCATAACAGTCACTTACTTTGGCTTGACCCCTAG**  
**CATCTGAAATGCTGACAGTCCCTCCTCAGAACAGTGGATGTGCACAACCCCAACCTCCCAAGCCAGGGT**  
**TCAATGGGGCCCTGGCCACAGAGGCCAGTGTTCAGGGGAAGGACAATGAAGAGTATTATCTTCGCAGGA**  
**GATTATGTCTCACAGACTATTAGAAGACATTCTGTAAGACTTACACAATGAATGGAATCTTTATCACCCC**  
**TTTACATCTCAGAGTTACTCATGTAATAAAGGTAAAAAATAGGGCACAAGAAAAACCTTTAGGATCAAAA**  
**ATTTATTAATAAACAATATATCAACAGGCATCAAGTCTACAGATTACAGGTTACACCAGACCATGAAGTA**

AATTCTGTCCCCATCCACACCATACTTGCCAGGTCTTCTAGACTCCTGAGCCATCTCCCTATATCCTCAT  
CCAAATTCCCAGATTACAGGCTTAGGTTTTTGGTTTTGGTTTTTCAGTCCAATGGAGGTGGGGGCAGCTATG  
TGTTGATTTTTTGGCACCACCCCTGTGGTCATACCTAAATATTCACCTTCTACTCAATCCCACAAAGGGAA  
GGAAACATGTATGTAGAGGGCCCCAGCCGACTCAAATCTCAGCTCTACTTCACAGTAAAACCTGTGGGCAA  
GCCAATTAACCTGGAGGGCGTGATTATAACCTAGTAAAGATGTGTATTCACAGAACCAAAAGACTGGAAT  
GACATGTAGAAAAATAAAAAACATAAAAAGAGGTCAATTTTTTTCATCTTAATATTGTTGTACATACTTTTACAAT  
AAAAATAGGGACTCATCAGAAGTGCTGAAAGGTGGCGAGGGAGCCTTCAAACCATGCAGAGGAACCAACT  
CAAATCCACTTCAGGCTATGCATTTAGCAGCTTAGCCCAATGCACCAGGTCATCTGAGGAGACTCAGGCA  
CCGCTACTGAAGAGTCCGTTTTCTGAACTCCCCACTATGTTTTCCCTGATCGGGGTGGGCATGGGTCTGGGG  
ATTTATCCCAGAGGCAATTATTTGCTGAGTGTGGGCCATAGTAAAGAAAAAAGCATTACATTCTCAAGCC  
TCAACATCCTTACCAACAATGCTTCCCAACTGCCTCAAAGCTCTCCTAAATGAGAACATAGTTCTTTCTG  
AGCAAGTCCCTGTGGACCATGAAGAATGTCACCAAGCTCCCTCAGAGTCAGCGGGAGCTCAGCCAAAGC  
ACAAGTGCAGTGGCCAGCTCCTCCACTCTGCACCTGCTGCCTCAGACTCCCCACGCTGAGCCCAGGCCC  
CTACCCTCTGAAGGTGTTTTCCCATGTGATTTCTGACACACACACCCCAAGAACCAGATGATCTATGACA  
TACAGCATTTAGCTAAGGCTCCCTGCCAGGCCCTCCCTGTGTACATACTGTGCAGGGGCACATAAAA  
GAGGATTTTTGAGAAACTGATATACAAACTGCATCAGCCAAAAGCTGCAGCCCCAAAAAAGAGAAATACA  
TAAGACTGACTTATTTCCATCCCTAGCTCCCAAACCTGACAGTGATCAGAGCCATCTGGGAACATTTTTT  
AAAAGTCCCTGCCCCGGTGACCCCACGCTACACTTCCTAAGTCAGCGTCTCCAGTGTAGGGGCTCCCAGTG  
ACACTGCATAATCAGTCTGTGGGTGGGGAAGCTTTGCTCTCGTCTGTGCTCGTTGCCCTCACTGTAGTCT  
GCGAGGGCAGCAACTTAAATAGTAACTGCCGATACATGAAAATAGAGTAAGAAGTGGGGGAATGAGTTT  
AAGTCAAATGATAAACACTAACCCTAGTCTGCCAGCAAGAAGAGACAAAAACATATCTGGAAATGCATT  
TTCTCACTCAGGATGCAACCCATCTATGCCCTGCAGCCTGACCAAGCAGTGTGACCCTGTGGACAAA  
GAGGCAGGATCAGTACATCTGTTTTATTATGTCAAGGCTGGCAAATACCTAGCATGAATGTGTGCTAGT  
TCCCCACTGTGCCATGATAGACATCACTAAGGAACGCACACTCTTCCCAATCCACCCAAACAGGGCCT  
CGGAGCCCCCTGAATAGACTACCCTCCCAAGAAATCAGAGCTGGCTGGAAAGTGAAGCCACCTGCCCT  
CCCTGTCTCAGCCTCTCTGCACATTTGTGGCATCACACCAACCTCCAAGGCAATCCAAATGAGAACCCTG  
AGGAAATAATGTGCCCTCAAAGCAAAGCAAATTCCTTCCCTTCTCAATGATGCACCTGGAGTTTAGGGGC  
AAATGCGTAACATTTGTTAATTTGGATAAGGGTCATATTAATATATCTGAGCCACCCAACAAGACAAGGCC  
CTGCACTGGATGAACTTCCCCAACAGTCTCTCCCAAATGCCTCAGTCTGAATTCATTATTTCCCTTCACAC  
TTGGTTAGGTCCTATTTGTGCCAAGTCTATTAACAGACTGCAAATTTTTTGGCAGAAACCCTTGAAGCC  
AGTCCAAGGATGCAGACATGCATTGTTGACATGAAAGCAAAGATAAAGCTATGGAGGCTTACCTCGAATA  
TGGCAACTGGGAAGTGAATCAATAACATGGAGGTAACAAGGACTGGGGACAAGCGACCTGATCTTTATCA  
CCCTGAAGGGGAAAGGTTACATGAAATGTTTTGGTCTTCTGGGCCACACAGGGCTGTCTTGGCTGCACAG  
CCTGTACTAGGTAAGCAGCATGTAGGTGCTCACCGGGAACCCACATCACTCAAACACTGAAGGTGTGTTA  
GTCCATAATCTTTATTTGGCACCCGGAGCTCCCAGGCCACAATGTGCAAAGCAGTAGTATATTTAAGAA  
AGCACTAGACCTCACAACCAACAGCCATAAGCAAATGGAAACCGTGGTAGCACAAAGTAAAATGAAAAA  
TAATGTATGTTTTACAAGACCTGTATACCCTGACCATAGAACCAGGACAGAACATTTACTTCTAAGCAGTG  
GCTCATCCATCCTGTATGACATGAAAGGGTATGAAAACCAGGGAACCCACTGAGGAGTCAGCCTCCAGAT  
ACAGTTCAGTGCAGAGGAGGAGGAGGAGGAGAAACACATGAGAAGGGGGAATACACGGTTTTGAAAAATGGTT  
AAAACCTCAAAGACTGAGCTGAGGCTTGAGCCAAATGAAGGAAAGCAGGATCCAAAGGGGCACTGCCCA  
TTCCCATTAAGAAAGCTATGAAAGGGCTTGACGGAAAAATTCCTAGTAAGTATCAGCTAAAACAAAGGCA  
CCTAGTTAGGGTGAACCTAGTGCCAGTGAAGGCGGATGGCTCTCAAGCTGAGAGAATAAAGAGGATGAG  
ATATCCAGAAGTCACCCACTCTCACTTCCCTAGAGTTGAAAAGAGCATTATAATTAACAGGCTATAACCCTC  
AGTAAAAGGTGTTAAGTTCAGCAAAGGGTGCCACCCTGGGAACTACTCCTAAATTTCTAACCCTAAAAA  
AAAACTAATTTTTCTATGTTGTAACCTCTATGACTTTATTTCTAATCATCCATCGTCAAACCCTGCTAAGA  
CAAGCAACCCATAAGGTCTTTCTGTTTTCTCAAGGGAATAGCATTACCATTTCAATTAGTCTACAAAGATC  
AGCAATGAGTAACAAAATATAGAGAGACTGGCAGTTCATAATATGCTTCTCAATCCTGAGCATTATTTTT  
CTTTCATCCCCCAAACCAAACAGCACCAAAGGAGATGTAATAACAAATATTTCAATGTGGATATCTGCAG  
TTTAAACAGCCTTAATAACTGTAGCTATAAAATGTTAAGAGCTATCGTATTTTTGGTGGCAATTAAGAGTTA  
TTGATATTTCTGAAATTCATTTGAGATTTCACTGTAGCTTTAGCAAATATTGGCTCTGGAAATAATAAA  
TTGTTTTACAATCTTAACATTTAAGAAAACTTATTGCCATCAAATTAACCTAAACCCACATTTAAAAT  
TCAATCAAAATAAATGCTCTTGATCAAAATACTGATATATTTTAAACATATTTAATATTGACCCAATTT  
AATGGAAAAATATATATTGCTCCATTTATAATCAATATGTTGAGATTAACACTTTTATTAATTCCTTGC  
AGTAGTTAAGAAAAAGTCTGACACCGCTCACTGTTCAAGAGTACTGGGCAACATTCCTCAAACAACCTTCA  
CAGGTAATAAACGTGCACAGAAACGAAAGCTGTGCTGAGGGATGACAAATATAAGCCAGCCCTCATCTGT  
GCATTACTACATAAGGTGCTACTAGAATGTGAGTGCCGCAACTCTAAGAACAGGATTTAAGTCACAGGT  
CCTCAAATTACTGTTTTAAAAGAAATGACACACTATTTTCGGAAAGGTTATGGAATGTCTGTAGTGTCTGG  
ACGGGGGTTAATGAGCAGTCTTAAGTAACAAGAAAAACACCAGGTCAACCTTCACTCACAAGGCCAAT  
AAATACAACAAACTAGTCTCTTCCACTTGAGAAATAAGAAAAAAGTGTGAGGATTGGGAAAAAGCCAT  
CCCCTATCAAGTATTTTTAAAAGTAATAAGGTTCCCTTTTTCCCTTTGACTTCCCTTAGAGCTAAGTGAGCT  
CTAAGTCAAGGAGACTTGAAATGCGCGGCAGTAGCACAGTGTTCAGTGGGCCACCATGGGGAGGCCTGCA  
ATACAGATTTATTTTTCTGGCTCTCAGAAAACGTGTGGCAATATGCAATTCAGACTTCATGTTTCACATG  
TTCACCTTCCCTTTTATGGTGTCTGCTTTATACAATGACAATGTCATGGAGCTAAAAGCCAAAGTCAGTC  
TCTAACATAAAAAACAACAGTGAAGAAAGGTATGCTGTGCATACAAAGTACACTTTTTTGCATGATGGT

GGCTTATAATTATGCAGATGACTATTTTCTCAAGACAAAGGAAGGATTTACAAAAGCAAGCTTATTCTTT  
CTATGCCAAAGCTTAAGTTTCAGCTCTTTTTTGAAGAAAAGTTCTCTAAAATTACTTTTCTGCTTCAAAA  
GGGAAAACAGAAACCCCTATCCAGTATGCATTAATTCACCCTTTTCTTTTCTGATACTCATTCTAGGG  
TGACTGTCGGTATAAAGGCGACACAGCTCACACTCAGCCCTCTGTATGCCTCTTGCCCCAGCCTTCCCTT  
AAGTTTTTCATCTTAGACTTGCCTCCAAATCCAACCTAAAGACCTAGAAGTACATGCATTTGGGGCCAGCA  
TCATTAAGGACTCAGGGGCCCACTGCTTCTAGCAGGTTAAGGCTGCAGAAATCCAACCTCTGTATAATC  
GGGGGGTCTAATATATTAAGCTGGATCTAGAATGCTTACATATTAATAAACCTGTCACCTAAGATAAAG  
CAAACAGTACAATGTATTTATAATCCCCACAGACCGACCTTAACCGCTGCTTATAATAATCTTCATCTCC  
ATCATCTCGGTATCTTCCCACTTTCCGACCTCCTCCTCCTTCTCCTACAGAAGCAGCTTCAGCTTCT  
TCCCCAGAACTTGGGAAAAAGTCATCATCAATCTCCTGCACTGGCACTTTCTTCTGCCGTTTCCCGCCCT  
TGGGCAGAGGCTTCAGCTCATAGTCAGTACCATCTCCAGACAGGTCCGCCTCTGCCCCCTCCACCTCGTC  
ATCTTCC

>NC\_000015.10:34102083-34108686 Homo sapiens chromosome 15, GRCh38.p13 Primary Assembly (PGBD4)

GCCTATGAAGGGGACTGCCCATGAAGTGAAAGTCAAGTGTGTGTTGCTGCGGCAGCCACGGAGGCCAAGG  
ACCTCACGGGAGTAAAAGATGACGAGACTGGCTTCGGGAGAAACACCATCCAGAAGAGACCTTTCAAAAA  
ACTTCTAGAGACTCCCCAAGACGTATGAGATGAAAGGCTTCTTCTGTCTGTGTGCGTTTAACTCATTCT  
CCTTAGCCCCGAGATTACGCGCTGTGTGCCGTGCAGCTGCAGCGTTTACGCCGAGATAACTCGTGGATTA  
CAGTGCCAACCTTACTCCCA**AAGTTTGCCACGAAATATCTCGCTTCTGTTATTTTTCGCATGTTTCTGGTA**  
**TATTGACTTTTAAAACAAAAGACATCATTCTGTTTATAGCATTCTGTTTTTATAGTAGTGGATTTCATCT**  
**ACAAAATATAGTAATTCTCGATCGCTGAAATGTCAAATCCTAGAAAACGTAGCATTCTATGCGTGATAG**  
**TAATACCGTCTCGAACAGTTGTTGGCTGAAGATTCATTTGATGAATCTGATTTTTTCGAAAATAGATGAT**  
**TCTGATAAATTTTCGGATAGTGCTTTAGAAGCCGATAAGATCAGGCCTCTGTCCATTTAGAATCTGATG**  
**GAAAGAGCTCTACATCAAGTGACTCAGGGCGCTCCATGAAATGGTCAGCTCGTGCTATGATTCCACGTCA**  
**AAGGTATGACTTTACCGGCACACCTGGCAGAAAAGTCGATGTCAGTGATATCACTGACCCATTGCAGTAT**  
**TTTGAAGTGTCTTTACTGAGGAATTAGTTTCAAAAATTACTAGAGAAAACAAATGCCAAGCTGCCTTGT**  
**TGGCTTCAAAGCCACGGGTCCGAAAGGATTTTCGCGAATGGATAAATGGAAAGACACTGACAATGACGA**  
**GCTCAAAGTCTTTTTTGACAGTAATGTTACTGCAAGGATTGTGCAGAAACCTGAGCTGGAGATGTTTTGG**  
**TCAACAAGGCCCTTTTTGGATACACCTTATCTCAGGCCAAATTATGACTGGTGAAAGATTTTTACTTTTTGT**  
**TTCCGGTGCCCTGATTTTTGTCAACAATTTCTATATCTGCTGGTCAATCAAAGGCCAGATTTTATTGCA**  
**GAAGATCAAACCTGTGTTCCGACTTTCTTGTAATAAAATTTCCACTGTATATACTCCAAACAGAAACATT**  
**GCAGTTGATGAATCACTGATGCTGTTCAAGGGGCCATTAGCTATGAAGCAGTACCTCCCGACAAAACGAG**  
**TACGATTTGGTCTGAAGCTATATGTACTTTGTGAAAGTCAGTCTGGTTATGTGTGGAATGCGCTTGTTCA**  
**CACAGGGCTGGCATAAATTGAAAGATTCAGCGGATGGCCTGAAATCATCACGCATTGTCTTACCTTG**  
**GTCATGACCTTCTTGCCCAAGGGTATTGTCTCTTCCCTCGATAACTTTAATATATCTCCCAGCTTTTCA**  
**GAGAATTACATCAAAAATAGGACTGATGCAGTTGGGACAGCTCGTTTGAACAGAAAACAGATTCCAATGA**  
**TCTGAAAAAAGGATTGCAAAGGGACGACTGTAGCCAGATTCTGTGGTGAACCTTATGGCACTGAAATGG**  
**TGTGACGGCAAGGAGGTGACAATGTTGTCAACATTCACAATGATACTGTGATTGAAGTAAACAATAGAA**  
**ATGGAAAAGAAAACAAAAGGCCACGTGTCATTTGTGGATTATAACGAGAATATGGGAGCAGTGGACTCGGC**  
**TGATCAAATGCTTACTTCTTATCCATCTGAGCGCAAAGACACAAGTTTGGTATAAGAAATTTCTTTCAC**  
**CATCTTCTACACATTACAGTGCTGAACCTCTACATCCTGTTCAAGAAGGATAATCTGAGCACACGATGA**  
**GCCATATAAACTTACAGACTGGCATTGATTGAAAGAATGCTGGAAAAGCATCACAAGCCAGGGCAGCAACA**  
**TCTTCGAGGTGCTCCTTGCTCCGATGATGTCACACCTCTTCTGCTGTCTGGAAGACATTTCCCCAAGAGC**  
**ATACCAGCAACGTCCGGGAAACAGAATCCAACCTGGTCGCTGCAAAATTTGCTGCTCCCAATACGACAAGG**  
**ATGGCAAGAAGATCCGGAAAGAAACGCGCTATTTTTGTGCCGAATGTGATGTTCCGCTTTGTGTTGTTCC**  
**GTGCTTTGAAATTTACCACACGAAAAAAATTTATTAATACCCGATCATCATACACATCTGTTCCATTAGG**  
**ATTAGAGACAAGTTCTGTTTAGAAAATAACTCCAAGATTTGGGAGGCCGACCTGGGTGGATCACCTGAGATC**  
**AGGAATTC AAGACCAGCCTGGCCAACATGGTGAAACCCTGTCTCTACTAAAAATACAACAATTAGCTGGA**  
**TGTGGTGGCACATGCCGTGAATCCAAGCTACTTGGGAGGCTGAGGCAGGAGAATTGCTTGAACCCATGAG**  
**GCGGAGTTGCAGTGAGCTGAGATCACACCCTGCCTCCAGCCTGGGTGACATAGCGAGACTCCATCTC**  
**AAAAAAGAAAATAACTCCAAGAACAGTTTGTGTTTGTGTTTTGTTTTGTTTTGTTTTGTGTTTTGAGACGGAGT**  
**TTCACTCTTGTGCCCCAGCTGGAGTGGCAATGGCATGATATTGGCTCACTGTAACCTCCACCTCCCAGGT**  
**TCAAGCGATTCTGTGCCCTAGCCTCCCTAGTAGTGGGATTACAGGCATGTGCCACCACCCCACTCAAT**  
**TTTGTCAATTTTGTAGAGACTGGGTTTTATCCATGTTGGTTCAGGCTAGTCTTGACCTCCCAGCTCAGGT**  
**GATCCGCCTATCTGGGCCCTACAAAAGTCCCTGGGATTATAGGCATGAGCCACTGCGCCTAGCA**CCAAGAAC****  
**AGTTTTTATATTTTATTTTTCACATTGAAAATCAGTCAGATTGCTTTCAGCCTCAAAGAGGGTGTGTTATGT**  
**AAAACTAAATGAGTGCAGGCAGCGAGCTACACTTTTTTTTTTTCTAAATGGAAAATGGGAAGGAGATACT**  
**GTCTCTGAACAAAAATAGCTGGAAAAACACATAACTGTTAACTAAGGGTTGCCTCTAGTGAAAAGGATTG**  
**GAAGACAATTTATCTGATGCTACACTATTTCTTCTGTGTTGTTGATTGTTTTACTGTGAACATAACAAGTTG**  
**TATTGGGGAGGAGGGCAGGGTGTGATTGCTGCCAATGTTGATTGCTGAGGCCTTAGCCAAGATTTACGGC**  
**ATCATTGTCTCCAGTCTTTTCAATTTCTTTATGGTGGAAAGTGAAGTGACTTGCCCAAGATCTTTGTTGG**  
**CCCTAAACATCGTGTCTCTGCTACAGATTCCTATTGAGAGCAATGCATGTTTTAGCCTTGTGCACTCTT**  
**AGAGTCAGCATCATGGGAAAGAGTAACAGCAATTGAAAAAAGAGATTCAAGAGCCAAGTACTCAGCCCTG**  
**GCAGGGGATGGGGACATGATGCCAGAGCCACCCCTATACTCCAGTCTCCCTGGCATCAGCTACTGCAGT**  
**ACTGGGGTACTTGCCCTCATCTTTTTTTCTGAAGATAGTTACTTCTTCATATTTGATCATCGGAAGGAGCA**  
**GCATTGCTCAGAAACACACACACACACACACTTGACTTTCTTGTCTGCCAAATAAAATTTCTTATTT**  
**GCTAGGGAACCTGGTAATCTAGGCTCAAGAAGTGTGTGGAGAAGGTTATTTTCACTTTTACTTTAAA**  
**ATATGCCTTAGTTTTTGAATAGATAAGACATTC AAGTGTGCAAAAAGTAAAAGTCAGTTCAGGACTGAGAA**  
**AGGAAAGATCAGTGCTGATTTTTAATCAGACTGTAATGTACCAACTAGATACAGACAGGCGCCAGTGGCAAG**  
**GCCATCAGAAAACCTTCTCCCAAGCCACACCACCTGCAAAAATGCCAATAACAACCTTCTTTTTCAGT**  
**GATTACCACCTTTCTACCAATGACTTCGCTTTGTTTCCCTCGTGCCTCTGAACAGACTGCTGAGATACCCAA**  
**TCAAGAGCCAATCCTTGCTTCCCTAGACTCTCCTCAATCATTCAACAGAAGCCCAAATCTTGTAAGGTT**  
**CCTTCTGGGCCGGGCACAGTGGCTCAGCCTGTAATCCCAGCACTTTGGAAGGCCGAGATGGGCGAATC**  
**ACAAGGTCAGGAGTTTGAGACTAGCTGGCCAACATGGTGAACCCCTGTCTCTACTAAAAATACAAAAA**  
**AAATTAGCTGGGCATAGTGGTGGGTGCCGTGAATCCCAGCTACTTGGGAGGCTGAGACAGGAGAATCACT**  
**TGAACCCGGGAGGCAGAGTTGCAGTGAGCCAAGATCGCACCACTGCCTCCAGCCCTGGCGACAGAGTG**

AGACTCCATCTCAAAAAATAAAAAAGTTTCCTTCTGTTCCCTCTTACTGTTATATCCTTGGTTTTCTCTGG  
TGTGGGGTCTTCCCTTACAGCAGCAAGCTCATAAACTTAACTTGACCGCAGGTGTGTTCCCTTGGTGGTCTT  
TATCTGATAGACTTTTGTACATGGTACAATATTTCAAAGGCACATGGTACAATATTTCAAAGGCACATGG  
TACAATATTTCAAAGGTATGAGTATACAAAAAAATCTCCACCTACTTCTCTCCCTAGTCACCCAATTC  
TCAAGAGGCAATCACTGTTGCCATTTTCCCTGAGTATTTCCACAGATAGTCAACTATCTACAGAAAAAT  
ATATACATTAATAAAGGCCAGGCACAGTGGCATGCCTGTAGTCCCAGCTACTCAGAAGGTTGAAGCAG  
GAGGATCACTTGAGGCCAGGAGGGCCAGGAATTTGAAGCTGTAGTGTGCTATGATAGCAGGCCTGTGAAT  
AGCCATTGCACCTCCATCCTGGGCAACATAGCCAGACCCTGTCTCTAAAAAAAAAAAAAAAAAAAAAAAAAAG  
ACAAAAAACAAATCCATATATACATATATATGTATATATATAGTATGCTACCAGTTGTGTGAAAAAAGG  
GGCAAAATATATATTTTATTTAACTTATATACAAATAACATTTCTAGAAATAAATTGTTTAAATATAAAATAC  
ACTAATATATAATAATGTATTACCTAACATATGATTATATATAACTATAATGTGTACTGTTTTACATACA  
TATTTCCAAAGTATACTATAAATGCACCTCCGCACCTTGTCTTTTTACTAAATATATCTTGAAATCAT  
CCTTTATTCGTACATAAAAAGCTTCATAGTTCCTTTTTATGGCTGCAAAATGTTCCAGCTTATGGATGGA  
CTGATTTCTCTATCGAGCAACATTAAGATTGTGTCCATTTTTACTATTCCCTAATTTTGTGGAAGTGAATTT  
CTTTTGCCATGTGATTTCCACAGGTGTATATATGTAGCGTAATTAGTACTAGTAGAAAGTAGAATTGCTA  
GATCAAAGAGTATGTGCCTTTGTAATTTTGATGATATTGTGAAATCTTCTTCCACAGAAGTTGTTGCAAC  
TTTCACTCTCACCAGCAATGTGTAAGATAACTTGCTTCTTCATACCCTCACCAACAATGAGCTATCAAAT  
GTTATTTTTTGCCAAGCAAATAAATTAAGTGTATCTCAGTTTTTGTGTTGTTGTTGTTTTTGGAGAC  
AGAGTTTCACTCTTTGTTGCCAGGCTGGAGTGCAGTGGCGTGATCTCGGCTCACTGTAACCTCCGCCTC  
CCAGGTTCAAACGATTTCTCTGTCTCACCCTCCCGAGTAGCTGGGATTACAGGCACCTGCCACCACACCC  
AGTTAATTTTTGTATTTTTAGTAGAGACAGGGTTTACCATGTTGGCTAGGCTGACCTCGAACTCCTAAC  
CTCAGGTGATCCACCTGCCTCGGCCCTCCCAAAGTGTGGAATTACAGGCGTGAGCCACCATGCCTGGCTC  
TTCTTGCTTGTTTTGTTTTGAGACAGAGTCTTGCTCTGTGAGCCAGGCTGGAGTGCAGTGGCACGATATTG  
GCTCACTGCAACCTCTGTCTCCAGGCTCAAGCAATTTCTCCTGCCTCAGCCTCCTGAGTAGCTAGGATTA  
CAGATGTGTGCCACCACGCTGGCTAATTTTTGTACTTTTTAGTAGAGACGGAGTTTACCATGTTGGCCA  
GGCTGGTCTCAAACCTCCTGACCTCAGGTAATCCGCCTGCCTTGGCCTCCCAAAGTGCTGGGATGACAGGC  
GTGAGCCACCACGCTGGGCCCTTCTTGGTTTTTTAATCCATCTTCTGCCATATGGTGAATTAATCTAA  
GTTGTATTGTAGGATTAATGGAGAGCAGCTAAAGAGGAATAAAGCCATGTGTTTCCAGCCAAGGATAGTTAT  
CATGAAGGATAAAAAGCCTCAAATCCTGATTTTGAATACAAAGTGCTGATTTTAAATCAGTACATGTT  
GAGCTGAGCCCTGAGGCCTTTGTTTTCAGTCCCAACCAGAGCAGAAGTAAGCATTGTTGAAACCGTAGTAA  
AAAGATTATTTGAGAAATAATGGAATGGGACAAAGGATTATAATGTGCTACAGCCCTCTGACCATTACAC  
TTTCTAAACTATTAATAAAATTTTACTTTTTCAAAAATGATTTCAAAAATTGCAAAATTTAGAAATATGCT  
GAAATAAAAACAGCTTCATCCCAA

**Supplementary data 3. Sequence alignment of *pble* transposases and PGBD proteins used to calculate the phylogenetic tree shown in Figure 4.** The black shade is for residues which are present in more than 60% at a position. Yellow is for the position of the catalytic triad. The blue line is for  $\beta$ -sheet and red line for  $\alpha$ -helix.

Tni-pble 1 NIYDPLLCFKLFFFTDEIISEIWKVNTNAEISLKRRESM--TGA-----TFRDTNEDIYAFFGILVMTAVRK---DNHMSTDDLFDRS--LSMVY  
Hmel2-pble 1 QDKRPIEWFENFLDDEDVISLIVSESNKYAVKKNLPG-----DITTEDMKCFIGILLVSGYSW---LP---RRRMWYENSPTKNELI  
Csu-pble 1 ---RPIEWFENFLDDEDVISLIVSESNKYAVKKNLPG-----DITTEDMKCFIGILLVSGYSW---LP---RRRMWYENSPTKNELI  
Smi7-pble 1 KVRTPTTEYFELFLNDDVMELIVTYSNLYASTKGVNLS-----LTNSELKCFLGIIIFLSGYVS---IP---RRRMFWEQRTDSQNALV  
Lfu-pble 1 EVGTPTELLERFLNDEVIELIVYNSLYAASKGVNLS-----LSNSELKCFLGIIIFLSGYVS---VP---RRRMFWEQRADAHNGLV  
Hvu-pble 1 TAKTPTTEIFELFLDDKVEIIVTYTNLYASENGLTLG-----LSNSEFKFLLGIIILSGYVP---LL---RRRMFWEQRPDTHNKMV  
Ppa-PGBD3 1 VMRTPTEILELFLDDEVIELIVKYSNLYACSKGVHLG-----LTSSEFKCFLGIIIFLSGYVS---VP---RRRMFWEQRTDVHNVLV  
Hsa-PGBD3 1 VMRTPTEILELFLDDEVIELIVKYSNLYACSKGVHLG-----LTSSEFKCFLGIIIFLSGYVS---VP---RRRMFWEQRTDVHNVLV  
Ota-pble 1 EASTAIDFFELFFDAELVDKIVLETNRYASLQKKRAL-----NVCTSEELKCFIGILLVSGYTO---VP---RRRMFWEDNSDAHHEIV  
Hsa-PGBD2 1 QELSPVGLFELFFDEGTINFIIVNETNRYAWQKNVNLG-----LTAQELKCVLGIILISGYIS---YP---RRRMFWETSPDSHHHLV  
Ppa-PGBD2 1 QELSPVGLFELFFDEGTINFIIVNETNRYAWQKNVNLG-----LTAQELKCVLGIILISGYIS---YP---RRRMFWETSPDSHHHLV  
Tma-PGBD2 1 QELSPVGLFELFFDEGTINFIIVNETNRYARQKNVNLG-----LTAQELKCVLGIILISGYIS---YP---RRRMFWETSPDSHHHLV  
Tma-PGBD1 1 EKLNPVELFELFFDDDTFNLIIVNETNRYASQKNVNLG-----VTVQEMKCVFVGLLLSGFVR---RP---RRGMWYEIS-DADKNLV  
Hsa-PGBD1 1 EKLNPVELFELFFDDDTFNLIIVNETNRYASQKNVSLG-----VTVQEMRCVFGVLLSGFMR---HP---RREMWEVS-DTDQNLV  
Oaf-PGBD1 1 EKLNPVELFELFFDDDTFNLIIVNETNRYASQKNVNLG-----VTIQEMKCVFVGLLLSGFVR---RP---RRGMWYEIS-DADQNLV  
Nvi-pble 1 KKNVESFLFSQIFSTSLDSDVVTETNKYAFQKKSKN-----WHDNTNEEVSALIGMWILMGIHK---LP---RVRMWESSDPFLKVDV  
Smi2-pble 1 STDKEKDYFGTIFTEEILQNIIVDETNRYANQPKKNKRLGSKNTKDIILNWKKEITSEELKAWIGMHILMGIHQ---LP---ELKNYWSTDPILNVQSV  
Oaf-PGBD7 1 HTDTEIDYFELSVFTEEMLETIKDQTNLYATQERITRSRGQEIRRSTENWQPTTVEEIKAFIAVHILMGIHI---LP---ELRHYWSSDPLLGVASV  
Cas-PGBD7 1 HTDTEVDYFELSVFTEEMLETIKNQTNLRYATQERTIRSRGKEIKRSAENWQPTSVEEIKAFIAVHILMGIHV---LP---ELRHYWSSDPLLGLASV  
Laf-PGBD7 1 HTDTEVDYFELSVFTEEMLETIKDQTNLYATQERTTRSRGQEIRRPTQNWQPTTVEEIKAYIAVHIVMGIHV---LP---ELRYWSSDPSLGVASV  
Cgi-pble 1 ADKNEIDFLNLLFPEELYSKISETNRYAQLCIRAKAN-----PGWYDTTPEEIRAFGLCLVVMGIIS---AP---AQDLWYSSDKLFLWSCI  
Bgl-pble 1 EDCSPLDYFKLFIITDEMIGLIVTETNRYAEQQQVAKG-----QRDSQWKPVTAQDIYTFLYINIMFGIHW---IP---STKLWYSSDKSRVPAI  
Pfl-pble 1 VQAQPLDYFLLISPSFLQLVIVDETNRYATQSQRING-----ADPSWYETKVDEMRAFIAVNILMGIHT---LP---DVNDYWSTDDRLOVPGI  
Ola-PGBD9 1 DDADTRDYFRLLFPDSLFEHMVEQTNNYALYRQRSG-----KSDPHWHPTDVREMKAYVGLNILMGINQ---LP---DTGMWASDIFIGNAGF  
Hbu-PGBD9 1 DDADTRDYFRILFPDSLFEHMVEQTNNYALYRQRSG-----KSDPHWHPTDVREMKAYVGLNILMGINQ---LP---DTGMWASDIFIGNAGF  
Pny-PGBD9 1 DDADTRDYFRILFPDSLFEHMVEQTNNYALYRQRSG-----KSDPHWHPTDVREMKAYVGLNILMGINQ---LP---DTGMWASDIFIGNAGF  
Tcr-pble 1 STESPVDTFLCLFPDSFIEHLVFOQTNLYATQLGKPF-----VPVTEEEMKIFIAINIMMGIKR---LP---SYRDHWSSYPQLRDSFI  
Bbe-PGBD5 1 PNTQPIDFFHMLVPESLLSAIVQTNRYAHKYQLKNG-----RDEEWRNVDLAELKAFMAIFMYTSIVHGIFSE---DITTVWEDNSITYNPVI  
Pma-PGBD5 1 ASATPADFFQLFVDPDGLLKIMVSQTNAYARKFQERFG-----QDPAWHEVDVAEMRAFLGVVASTATHH---CE---SVLSIWGGG-FYGNRSV  
Hsa-PGBD5 1 PSASAVDFFQLFVDPDNLKNNMVQTNMYAKKFQERFG-----SDGAWVEVTLTEMKAFGLGYMISTSISH---CE---SVLSIWGGG-FYSNRSL  
Oaf-PGBD5 1 PDASAMDFFQLFVDPDNLKNNMVQTNMYAKKYQERFG-----SDGAWVEVSLAEMKAFGLGYMISTSIIYH---CE---SVLSIWGGG-FYSNRSI  
Api1-pble 1 NNGTPIIDFYFLFIDDEVISLIVTETNKYANKKLASPN---IKRHSRLQKWIDTNESEIKNFLGIIIMYMGITVN---MP---TIASWYWTSS-HLLTSHL  
Api3-pble 1 ANATVWDCFNLFFTDDIIEELIVTETNRYAEQFLSSNR---ISKSSRFTKWWPTDSKEIKLFLSGLLIWMGLVE---MP---NLGSWYSTKHRYKNYVA  
Atr1-pble 1 ANATPIDFYSLLVTDQLFENIAHQTNIFAQQSIDKGG---IKDKSRLRLWPTDKEEMKRFGLGVIIWMGLIVK---LP---KIVDYWSSNDMLGQSF  
Psi-PGBD8 1 HEKTPYDFFKFFFITDDVIDYMKETNIYASQTLQKGNV---KPHSRLKKWYDVTSQEMERFLGVLFWMGLSK---KP---RLPDYWSKN-ILYDNSV  
Mmu-PGBD8 1 HEKTPYDFFKFFFITDDVIDYMKETNIYASQTLQKGNV---KPHSRLKKWYDVTSQEMERFLGVLFWMGLSK---KP---RLPDYWSKN-ILYDNSV  
Dma-PGBD8 1 HEKTPYDFFKFFFITDDVIDYMKETNIYASQTLQKGNV---KPHSRLKKWYDVTSQEMERFLGVLFWMGLSK---KP---RLPDYWSKN-ILYDNSV  
Pva-pble 1 DTTDPLQYFELFFTEELVSKITSETNAQAALLASKPPGPRGFPR-MDKWKDNDDELKVFVFAVMLLQRIVQ---KP---ELEMFWSTRPLLDTPYL  
Oab1-pble 1 FRSKCSSYVEKYLDHLSIIVKETNLRYADQFLQSHPNLKPRSR-MRKWYSTNNEVRCFIAAILLQGIIVK---KP---ALDMWFLKREIICSPPF  
Hsa-PGBD4 1 DITDPLQYFELFFTEELVSKITRETNAQAALLASKPPGPKGFSR-MDKWKDNDDELKVFVFAVMLLQGIIVQ---KP---ELEMFWSTRPLLDTPYL  
Uribo1 1 TNFQIIDEFNQFITEASLQDMVHFTNLRYAEQYLASHPLPGYSRA---HAWYPTNVGEIKRFLALTLAMGLIVE---RN---TLASWYDTTTTVLSIPLF  
Uribo2 1 SNFEPINFFQLFMTEAILQDMVLYTNVYAEQYLTQNPLPRYARA---HAWHPTDIAEMKRFVGLTLAMGLIK---AN---SLESYWDTTTTVLSIPVF  
Pxu1-pble 1 PNSTPLDAFQLFFSENLSNIVRETNNYKYVIANSSNKIKSRI---NSWKDTDISEMYAFFALTMLMPRVK---KL---AINEYWSTDELLQNTTF  
Xtr-PGBD6 1 NNFELVDFFHVVFVTEIDILQNMVIFYTNLYAEQFLARCPLPEYSQG---HAWHPTNTHEIKRFLALTIAMDLEH---GH---TLASWYDTTTTIISIPLF



Tni-pble 83 VSVMSRDREFDFLIRCLRMDDKSIR--PTLRENDVFTPVVKIWDLFIHQCIQNYTPGAHLTIDDEQLL-----GFRGRCPFRMYIPNKPSKYG  
Hmel2-pble 77 SSAMTRDRDFDFIFRHLHVNNDLQ-----DKYTKVVRPLVTLNKKFLEFSPLEEHYSVDEAMI-----PYYGRHGCKQHIKPKPIRYG  
Csu-pble 74 SSAMTRDRDFDFIFRHLHVNNDLQ-----DKYTKVVRPLVTLNKKFLEFSPLEEHYSVDEAMI-----PYYDRHGCKQHIKPKPIRYG  
Smi7-pble 77 SSAMRRDRFETIFSNLHVADNANLDP-----DKFAKLRPLINKLNELCMKFVPNETHFSIDESMV-----PYFGRHGCKQFIRGKPIRF  
Lfu-pble 76 SGAMRRDRFETIFSHLHVADNANLDP-----DKFAKLRPLIINKLNERCMLFVPNETCFSDDESMI-----PYFGRHGCKQFIRGKPIRF  
Hvu-pble 77 SSAMRRDRFESSIFTNLHVSNNANLDHE-----DKFAKLRPLISELNNRCLKFTPMETNFSFDESMV-----PYFSRHGCKQFIRGKPIRF  
Ppa-PGBD3 77 SAAMRRDRFETIFSNLHVADNANLDPV-----DKFSKLRPLISKLNRCMKFVPNETYFSFDESMV-----PYFGRHGCKQFIRGKPIRF  
Hsa-PGBD3 77 SAAMRRDRFETIFSNLHVADNANLDPV-----DKFSKLRPLISKLNRCMKFVPNETYFSFDESMV-----PYFGRHGCKQFIRGKPIRF  
Ota-pble 77 ANGMKRDRFEAILSHFYLANNYELDAE-----DKYAKIRPLVMTINEKFLCYAPIEEYYSFDESMC-----KYFGRHGCKQFIRGKPIRF  
Hsa-PGBD2 77 ADAIRDRFELIFSYLHFADNNELDAS-----DRFAKVRPLIIRMNCNFQKHAPLEEFYSFGEPMC-----EYFGRHGCKQLHRGKPVRLG  
Ppa-PGBD2 77 ADAIRDRFELIFSYLHFADNNELDAS-----DRFAKVRPLIIRMNCNFQKHAPLEEFYSFGEPMC-----EYFGRHGCKQLHRGKPVRLG  
Tma-PGBD2 77 ADAIRDRFELIFSYLHFSDNNELDAS-----DRFAKVRPLIIRMNCNFQKHAPLEEFYSFGEPMC-----EYFGRHGCKQLHTGKPIRLG  
Tma-PGBD1 76 RDAIRDRFESIFSYLHFADNSHLDQK-----DKFTKLRPLIKQMNKNFLLYAPLEEYCFDKSMC-----ECFD---SDHCLNGKPTRIG  
Hsa-PGBD1 76 RDAIRDRFELIFSNLHFADNGHLDQK-----DKFTKLRPLIKQMNKNFLLYAPLEEYCFDKSMC-----ECFD---SDQFLNGKPIRIG  
Oaf-PGBD1 76 RDAIRDRFELIFSHLHFADNSCLDQK-----DKFTKLRPLIKQMNKNFLLYAPLEEYCFDKSMC-----ECFD---SDQFLNGKPIRIG  
Nvi-pble 79 ANIMPYTRFSKLTETHFNNDNSMLPRTDPNYDKLHKIRPLIDHINQTSNKSYNTSKTVSVDDESMI-----PFSGRSSFIQYMPNPKIKRG  
Smi2-pble 91 ARVMTAKRFKKITETLHVNDNSTNPPRGQPGHDKLHKVVRPLSOLNDSICKAYEPSSTLSIDECMI-----AFKGRSLSLKYMPMKPIKRG  
Oaf-PGBD7 91 PDLMTKARFKKLTENIHCNDNSKAVPKGEPGYDWLHKLRPINALNSRLKEVYMPSSVMAVDETMV-----PFKDRSSLKQYMPIKPVKRG  
Cas-PGBD7 91 PDLMTKARFKKLTENIHCNDNSKAVPKGEPGYDRLHKLRPINALNSRLKEVYVPSVMAIDESMV-----PFKDR-SIKHHIPIKPVQRG  
Laf-PGBD7 91 PELMTKARFKKLTENIHCNDSSKAVPKGEPGYDWLHKLRPINALNTRLKEVYVPSVMAVDESMV-----PFKGRHSSVKQYMPIKPVKRG  
Cgi-pble 83 EERFTRRFENIQRYFHVADTTQNPPRNQPGHDKLVHVRTIMETIRENFKROYNAHKEVVIDEAMI-----GFSGRLGFKQYVPLKPTKRG  
Bgl-pble 85 ADVMGRTRFEKIRQYFHLNDSAHFPNRNSDNYDPLYKIRPLLDHVRSTCQAVYKPKQRKLSVDEAMV-----GFRGRLAMKQYLKPKPTPWG  
Pfl-pble 84 AKVLPKNQYKKLWHYFHINNNELDLPAGDPNRDRMFKVRPLLDLVHFSFAASYVPFRELWIDEAMV-----KFKGHSYMIQYMPAKPVKKG  
Ola-PGBD9 85 KKTMTARFEKLTQYLQLCDREAEVVRGERCYDGLYKIRPLLDVVENTMWDTYTPNRCLTIDKCSI-----ATKGRFSPTQYMSSKPVKKG  
Hbu-PGBD9 85 KKTMTARFEKLTQYLQLCDRESEVVRGERGYDGLFKIRPLLDVVENTMWDAYVTPNRCLTIDKCAI-----VTKGRFSPTQYMSSKPLRKG  
Pny-PGBD9 85 KKTMTARFEKLTQYLQLCDRESEVVRGERGYDGLFKIRPLLDVVENTMWDAYVTPNRCLTIDKCAI-----VTKGRFSPTQYMSSKPLRKG  
Tcr-pble 78 SPLMPVNRFGWLLTHLHVNNVLPKRDDNAFDKLYKLRPMLDTLSEFCKTCKFGNHSVIDESMI-----KFKGRSSFRQFMPNPKIKRG  
Bbe-PGBD5 87 ASIMTQRRFQHIMQYFHVVSS-----AQQQSDSLRKIRPFLEAVQNSFRNEFKTAQTHVHHEPPEEPP-----SVWSPRL-ERKRRKKR  
Pma-PGBD5 83 AVAMTRIRFEKLLKYFHVVAFRS-----AREDLPLGLYKVPFLDSLKSSFEASFMPSTQVHLHEPLIEEDPTPLAACASGGCASSEGGERRRRKKR  
Hsa-PGBD5 83 ALVMSQARFEKILKYFHVVAFRS-----SQTTHGLYKVPFLDSLQNSFDSAFRPSQTQVHLHEPLIDEDP-----VFIATCTER--ELRKRKKR  
Oaf-PGBD5 83 ALVMSQARFEKILKYFHVVAF-----RSSQTTHGLYKVPFLDSLQNGFDSAFRPSQTQVHLHEPLIDEDP-----VFIATCTER--ELRKRKKR  
Api1-pble 88 SHIMSRNRFELLSHIHFQNNND-----VANLNNRLYKIQNILDLNQLKFKQWVIPSHDMCIDESMI-----AFQGRLLVFKQYIQTKRYRYG  
Api3-pble 89 KKTMSRNRFELLRFWHFSDNK-----KAPEGDRIYKIRNIIIDKIVNRFQNVMEPGEVLAVDETMV-----PFRGRLFRQYIPGKAHKYG  
Atr1-pble 89 KKTMSRNRFVLLRMLHFSNNE-----EVPKNDRLYKIRRLVEILNQTFSIHYTPDECLVDDESMI-----PFRGRIIFRQYINKSKRHYG  
Psi-PGBD8 88 KKLISRNRFEMLLRMWHFSNNEECPPG-----DRLFKIQPLLDRLERFQVAVVPDKEICIEETMV-----PFRGRLSFIQYVKNKCHKFG  
Mmu-PGBD8 88 KKLISRNRFEMLLRMWHFSNNEECPPG-----DRLFKIQPLLDRLERFQVAVVPDKEICIEETMV-----PFRGRLSFIQYVKNKCHKFG  
Dma-PGBD8 88 KKLISRNRFEMLLRMWHFSNNEECPPG-----DRLFKIQPLLDRLERFQVAVVPDKEICIEETMV-----PFRGRLNFVQYVKNKCHKFG  
Pva-pble 90 RQIMTGERFLLLRCLHFVNNSHISAGQSKAQVSMQKIKPVDFLVNKFSTVYTPNRNIAVNESLM-----LFKRQLALROYIPMKRAQCG  
Oab1-pble 90 GKIFSADRFLLLCKFLYFENNAPHN--DMPSKCLKIKTVLEYVINKCKSLYTPKMDICIDESLL-----MWKGRLSWRQYIPSKRSRFG  
Hsa-PGBD4 90 RQIMTGERFLLLRCLHFVNNSHISAGQSKAQISLQKIKPVDFLVNKFSTVYTPNRNIAVNESLM-----LFKGRPLAMKQYLPKRVRF  
Uribo1 89 SAVMPNRNYQILLRFLHFNDNAAAVPPNEPQHDRLYKLRPLIDSLSRFAEAVYTPSQNICVDESLL-----LFKGRLLFRQYIPSKRARYG  
Uribo2 89 SATMSRNRYQLLLRFLHFNNNATAVPPDQPGHDLHKLRLPLIDSLSERFAAVYTPCQNICIDESLL-----LFKGRLLQFRQYIPSKRARYG  
Pxu1-pble 89 RKTMRVDRYLLLMQLHFND-----NNIHCEDPLIKIRPIVDDLKKSFAESFYPGKKLCIDESLM-----LFKGRVYFKQYIPSKRSRFG  
Xtr-PGBD6 89 SAIMPINRYQILLRFLHFNDNATAAPPNEPSHDLHKLRLPLIESLCKRFAEAVYTPQNICVNESPV-----FKKERLMFRQNNPKKRSRYG

β2

β3

α1

β4

α2

|            |     |              |             |          |         |          |        |        |        |         |        |       |       |         |       |       |       |       |      |         |           |         |         |            |         |            |
|------------|-----|--------------|-------------|----------|---------|----------|--------|--------|--------|---------|--------|-------|-------|---------|-------|-------|-------|-------|------|---------|-----------|---------|---------|------------|---------|------------|
| Tni-pble   | 167 | IKILMMCD     | SGTKY       | MINGMPY  | LGRGTQT | -----    | NGV-PL | GEYYV  | KEL    | SKPV    | HGSC   | ---   | RNITC | DNWFT   | -     | SIP   | LAKNL | LQEPY | KLTV | GTVRS   |           |         |         |            |         |            |
| Hmel2-pble | 156 | FKAVWGATRL   | GYVLWMEPY   | QGATTMCN | ---PI-  | YKELGL   | GASVV  | LTFCDV | LISR   | GFDLPY  | HVVV   | -     | NFFT  | -       | GTP   | LEEIT | TKK-  | GLR   | CT   | GTVRE   |           |         |         |            |         |            |
| Csu-pble   | 153 | FKAVWGATRL   | GYVLWMEPY   | QGATTM   | ---CN   | PIYKELGL | GASVV  | LTFCDV | LISR   | GFDLPY  | HVVV   | -     | NFFT  | -       | GTP   | LEEIT | TKK-  | GLR   | CT   | GTVRE   |           |         |         |            |         |            |
| Smi7-pble  | 158 | YKFWCAATRL   | GYICWFEPY   | QGNL     | --A--   | NK--     | YEEYGV | GASVV  | LRFTDA | LTEQH   | PGQY   | HVFV  | -     | DNFFT   | -     | SIAL  | LDKLG | SM--  | GHQ  | ATGTVRK |           |         |         |            |         |            |
| Lfu-pble   | 157 | YKFWCGATRL   | GYICWFQPY   | QGNP     | --N--   | TN--     | YEGYGV | GASVV  | LQFTEA | LTKEH   | PGQY   | HVFV  | -     | DNFFT   | -     | SIVL  | LDKLS | SM--  | GHQ  | ATGTVRK |           |         |         |            |         |            |
| Hvu-pble   | 158 | FKFWCGATPL   | GCICWFQPY   | QGNP     | --N--   | TQ--     | FQEYGV | GASVV  | LQFVEA | LTEEH   | PGEY   | HVFV  | -     | DNFFT   | -     | SISL  | LDKLS | SM--  | GHV  | TGTVRK  |           |         |         |            |         |            |
| Ppa-PGBD3  | 158 | YKFWCGATCL   | GYICWFQPY   | QGNP     | --N--   | TK--     | HEEYGV | GASLV  | LQFSEA | LTEAH   | PGQY   | HVFV  | -     | NNFFT   | -     | SIAL  | LDKLS | SM--  | GHQ  | ATGTVRK |           |         |         |            |         |            |
| Hsa-PGBD3  | 158 | YKFWCGATCL   | GYICWFQPY   | QGNP     | --N--   | TK--     | HEEYGV | GASLV  | LQFSEA | LTEAH   | PGQY   | HVFV  | -     | NNFFT   | -     | SIAL  | LDKLS | SM--  | GHQ  | ATGTVRK |           |         |         |            |         |            |
| Ota-pble   | 158 | FKIWCATRL    | GYLVNVDPY   | TGKNY    | ---KE   | KDDLNLGL | GGQLV  | YKFAKI | LKSQN  | PNPFH   | LFC    | -     | DNFFT | -       | SIA   | LSE   | QKI-  | GIR   | ATG  | TIKE    |           |         |         |            |         |            |
| Hsa-PGBD2  | 158 | YKIWCCTSR    | GYLVWFEPY   | QGTFL    | --T--   | KP--     | DRSLDL | GGSMV  | IKFVDA | LQER    | GFLPY  | HIFD  | -     | DKVFT   | -     | SVKL  | MSIL  | RKK-  | GVK  | ATGTVRE |           |         |         |            |         |            |
| Ppa-PGBD2  | 158 | YKIWCCTSR    | GYLVWFEPY   | QGTFL    | --T--   | KP--     | DRSLDL | GGSMV  | IKFVDA | LQER    | GFLPY  | HIFD  | -     | DKVFT   | -     | SVKL  | MSIL  | RKK-  | GVK  | ATGTVRE |           |         |         |            |         |            |
| Tma-PGBD2  | 158 | YKIWCCTSR    | GYLVWFEPY   | QGTFL    | --T--   | KP--     | DKGLDL | GGSMV  | IKFVDA | LQER    | GFLPY  | HIFD  | -     | DKVFT   | -     | SVKL  | MSIL  | RKK-  | GVK  | ATGTVRE |           |         |         |            |         |            |
| Tma-PGBD1  | 154 | YKIWCCTTQ    | GYLVWFEPY   | QEESTVTA | ---DK-- | DLDLGI   | GGNLV  | MNFADV | LLER   | GQPY    | HLCF   | -     | DSFFT | -       | SVKL  | MSAL  | KKK-  | GLR   | AT   | GAIRE   |           |         |         |            |         |            |
| Hsa-PGBD1  | 154 | YKIWCCTTQ    | GYLVWFEPY   | QEESTMKV | ---DE-- | DPDLGL   | GGNLV  | MNFADV | LLER   | GQPY    | HLCF   | -     | DSFFT | -       | SVKL  | LSAL  | KKK-  | GVR   | AT   | GAIRE   |           |         |         |            |         |            |
| Oaf-PGBD1  | 154 | YKIWCCTTQ    | GYLVWFEPY   | QEESTMKA | ---DK-- | DLDLGL   | GGNLV  | MNFADV | LLER   | GQPY    | HLCF   | -     | DSFFT | -       | SVKL  | VSAL  | KKK-  | GLK   | AT   | GAIRE   |           |         |         |            |         |            |
| Nvi-pble   | 165 | FKVWCLADSS   | TYVVKSEVY   | TGKARD   | GS----- | KNPL     | GERVV  | LNLSN  | ILGV   | ---     | YLVAF  | -     | DNFFT | -       | SVNL  | VEEL  | LDK-  | GIY   | SV   | GTVRN   |           |         |         |            |         |            |
| Smi2-pble  | 177 | YKVVWCLADSKT | GYIQKFEIY   | CGKETS   | DN--K-- | AKKLN    | LGETV  | VTKL   | TEDV   | KHTG    | ---    | RLIAH | -     | DNFFT   | -     | SFRL  | LAKK  | LLAS  | -    | GLF     | SVGTVKP   |         |         |            |         |            |
| Oaf-PGBD7  | 177 | YKVVWCLADSKT | GFVSQFDIC   | CGKKGV   | ---DN-  | NSSLS    | FGESV  | VGL    | CHSWY  | HSH     | ---    | RLIS  | -     | DSYFT   | -     | SYHL  | MKSM  | KER   | -    | GLY     | AVGTVRA   |         |         |            |         |            |
| Cas-PGBD7  | 176 | YKVVWCLADSKT | GFVSQFDIC   | CGKKGI   | ---DN-  | DSTFSL   | FGESV  | VGL    | CHSWY  | HSH     | ---    | RLIAF | -     | DNFFT   | -     | SYHL  | MKSM  | NER   | -    | GLY     | AVGTVRA   |         |         |            |         |            |
| Laf-PGBD7  | 177 | YKVVWCLADSKT | GFVTQFDIY   | CGKKGV   | VD--H-- | DSSLS    | LFGESV | VGL    | CHSWY  | HSH     | ---    | RLIS  | -     | NNFFT   | -     | SYHL  | MKSM  | MYER  | -    | GLY     | AVGTVRA   |         |         |            |         |            |
| Cgi-pble   | 169 | IKVWVRADPHN  | GFMNDFQVY   | TGKEGN   | ---VPE  | AN--     | GGRVV  | LDL    | MDSV   | LNLC    | ---    | HHVY  | -     | DSFFS   | -     | SPDL  | FLKL  | WNE   | -    | GTV     | ACGTVKP   |         |         |            |         |            |
| Bgl-pble   | 171 | IKIWCCEASS   | GYVLFNFRVY  | TGKSNY   | ---S    | PNPGL    | GYNVV  | LDL    | MSPE   | YLDKY   | ---    | HEVY  | -     | DNFFS   | -     | SLKL  | LAED  | LLER  | -    | GLT     | YSCATIRA  |         |         |            |         |            |
| Pfl-pble   | 170 | FKVWMLACPR   | TYCLSLDPY   | TGKKGGQ  | ---VA   | QKGL     | GYSV   | VWNL   | SRMY   | HNMW    | ---    | HILFY | -     | DNFFS   | -     | SVLS  | RALD  | LQKQ  | -    | GT      | LCCSTVVRT |         |         |            |         |            |
| Ola-PGBD9  | 171 | LTVMMLCDSRS  | GYCHRTKIHV  | GRPS     | ---ED-  | EGAAS    | LGH    | RVV    | TFLV   | RGLERQY | ---    | HHLFM | -     | DSFFT   | -     | SVPL  | LQRL  | LRD-  | -    | GLY     | ACGPTQP   |         |         |            |         |            |
| Hbu-PGBD9  | 171 | LTVMMLCDSRS  | GYCHRAKIYV  | GRPS     | ---ED-  | EAAACL   | GYR    | VV     | TSLV   | RGLEQY  | ---    | HHLFM | -     | DSFFT   | -     | SVPL  | LQRL  | LRD-  | -    | GQY     | ACGPTQP   |         |         |            |         |            |
| Pny-PGBD9  | 171 | LTVMMLCDSRS  | GYCHRAKIYV  | GRPS     | ---ED-  | EAAACL   | GYR    | VV     | TSLV   | RGLEQY  | ---    | HHLFM | -     | DSFFT   | -     | SVPL  | LQRL  | LRD-  | -    | GQY     | ACGPTQP   |         |         |            |         |            |
| Tcr-pble   | 164 | YKVVVRADSE   | GFVCQFIY    | TGK      | ---V-   | EG--     | NIEKLL | GAR    | VKDL   | TLELV   | GLG    | ---   | HHVY  | -       | DNFFT | -     | SVDL  | MISL  | KNQ- | -       | AIY       | ACGTVRN |         |            |         |            |
| Bbe-PGBD5  | 168 | FNLFVRQCTAT  | GFISQIYIHV  | K-----   | DKND    | NQTLHEK  | GYSI   | ARAL   | CSDL   | INSG    | ---    | RNHIF | -     | CEPLHT  | -     | SLRL  | FREL  | ESR   | -    | NIY     | GCGVITD   |         |         |            |         |            |
| Pma-PGBD5  | 174 | FGLWVRQCSQT  | GFICQIHVHL  | KESGSS   | GS      | DCLD     | AFRS   | KSQ    | LHGL   | VARR    | LCHNL  | -     | -     | PPSG    | ---   | YVIF  | C     | PSIT  | -    | SLPL    | FQEFQEK   | -       | GIH     | CCGLLSP    |         |            |
| Hsa-PGBD5  | 166 | FSLWVRQCSST  | GFIIQIYVHL  | KEGGGP   | --DGL   | DALK     | NKPK   | QLHSM  | VARS   | LCRN    | --AAG- | -     | -     | KNYIIFT | -     | GPSIT | -     | SLTL  | FEFE | EKQ-    | -         | GIY     | CCGLLRA |            |         |            |
| Oaf-PGBD5  | 166 | FSLWVRQCSST  | GFIIQIYVHL  | KEGGGP   | --DGL   | DALK     | NKPK   | QLHSL  | VAKSL  | CRNA    | AAGKN  | ---   | -     | YIIFT   | -     | GPSIT | -     | SLTL  | FEFE | EKQ-    | -         | EIY     | CCGLLSS |            |         |            |
| Api1-pble  | 169 | VKV-FKLCVSP  | CYTLKFKIY   | SGKESV   | V-----  | DKNDS    | VSSRI  | V      | MNLV   | DEYLDL  | G      | ---   | -     | RTLVT   | -     | DNWYT | -     | SVSL  | AHQ  | LLER    | -         | KTH     | LVGTLRS |            |         |            |
| Api3-pble  | 170 | VKL-FKLCGTN  | GYTYNVQVY   | YGK      | --SQ-   | -----    | VDGKGL | GCR    | VV     | LDL     | SRRYLN | MG    | ---   | -       | RTMVT | -     | DNFYT | -     | SITL | ANEL    | LSY-      | -       | DTH     | LVGTLRS    |         |            |
| Atr1-pble  | 170 | IKL-FKLCCTP  | GYTKVFRVY   | YGK      | --TL-   | -----    | DSQDNT | PTNV   | VNL    | LNARY   | FGK    | G     | ---   | -       | HTMFV | -     | DNWYT | -     | SIDL | AEKL    | VQH-      | -       | DTH     | LVGTLRK    |         |            |
| Psi-PGBD8  | 169 | IKLFLKCLKD   | GYTWNVKIY   | CGK      | -----   | EA-      | RSGIP  | VSSSV  | V      | MKLI    | IEGL   | LLDSG | ---   | -       | -     | HVLYT | -     | DNYYT | -    | SIHL    | AHQ       | LLER    | -       | STY        | LVGTLRS |            |
| Mmu-PGBD8  | 169 | IKLFLKCLKD   | GYTWNVKIY   | CGK      | -----   | EA-      | RSGIP  | VSSSV  | V      | MKLI    | IEGL   | LLDSG | ---   | -       | -     | HVLYT | -     | DNYYT | -    | SIHL    | AHQ       | LLER    | -       | STY        | LVGTLRS |            |
| Dma-PGBD8  | 169 | IKLFLKCLKD   | GYTWNVKIY   | CGK      | -----   | EA-      | RSGIP  | VSSSV  | V      | MKLI    | IEGL   | LLDSG | ---   | -       | -     | HVLYT | -     | DNYYT | -    | SIHL    | AHQ       | LLER    | -       | STY        | LVGTLRS |            |
| Pva-pble   | 176 | LKLYVLCESQ   | SGYVWVALVHT | GPSMNLK  | --NS-   | ADGL     | KSSRI  | V      | TLV    | SDLL    | LGQ    | G     | ---   | -       | YCVFI | -     | GNFYT | -     | SPML | FREL    | HQN-      | -       | RTD     | AVGTACL    |         |            |
| Oab1-pble  | 173 | IQFFVLCESSE  | GYIWNFFIY   | TGKETYCD | --SQ-   | YSEFN    | SARIV  | LQL    | CDEL   | FERG    | ---    | YRLYL | -     | DNWYT   | -     | GVPF  | IEKL  | CAH-  | -    | KTD     | VVGT      | IRK     |         |            |         |            |
| Hsa-PGBD4  | 176 | LKLYVLCESQ   | SGYVWVALVHT | GPGMNLK  | --DS-   | ADGL     | KSSRI  | V      | TLV    | NDLL    | LGQ    | G     | ---   | -       | YCVFL | -     | DNFNI | -     | SPML | FREL    | HQN-      | -       | RTD     | AVGTARL    |         |            |
| Uribo1     | 175 | MKLYKLCESST  | GYTSFFMFY   | EGKDSNLD | --PPG   | PLD      | TASG   | KIV    | WELI   | TPL     | LG     | G     | ---   | -       | YHLYV | -     | DNFYT | -     | SILL | FRT     | LYCL      | -       | -       | DTLACGTVRQ |         |            |
| Uribo2     | 175 | IKFYKLCESSS  | GYTSYFLIY   | EGKDSKLD | --PPG   | CPD      | LT     | VS     | GKI    | V       | WELI   | SP    | -     | -       | -     | FHLYV | -     | DNFYS | -    | SIP     | L         | F       | TALYCL  | -          | -       | DTPACGTINR |
| Pxu1-pble  | 169 | IKSFVLCCKT   | NVYVLYNIIY  | TGSKTECD | --ST-   | FSNVG    | KSGD   | V      | V      | M       | SLIK   | PYLDK | G     | ---     | -     | HTLIT | -     | DNWYS | -    | SPNL    | F         | D       | LLHKM   | -          | -       | KTNAFGTVRK |
| Xtr-PGBD6  | 175 | MKLYKLCESKT  | GYSGNFMIE   | GTDSFLD  | --PPG   | CLD      | F      | T      | S      | D       | KI     | V     | W     | -       | -     | YHLYV | -     | DNFYT | -    | SIP     | L         | F       | RALHSL  | -          | -       | DTPACGIVSH |





α3

α4

Tni-pble 311 MYYNQTKMGVDTLDQMCSVMTCSRKT-NRWPAL-LYGMINIAACINSFIIYSHNVSSK- - - - -GKVVQS-RKKFMRNLYMSLTSSFMKRRL  
Hmel2-pble 316 SIYNKYMGVDRSDENISHYRIGIRG-KKWY-MPLLTHMIDLAEHNAWQLYKIN-H- - - - -GKLD-HLGFRRRVAIALIESNRKNAK  
Csu-pble 316 SIYNKYMGVDRSDENISHYRIGIRG-KKWY-MPLLTHMIDLAEHNAWQLYKIN-H- - - - -GKLDH-LGFRRRVAIALIESNRKNAK  
Smi7-pble 317 KVYNQFMGVDRADENIDKYRASICG-KKWYSSPLLFC-FELALQNAWQLHKTY-DA- - - - -KPM-DLLEFRRRVCHYLETHGHPVE  
Lfu-pble 316 KGYNQYMGVDRADENIDKYRASIRG-KKWYSSPLLFC-FELALQNAWQLHKTY-DT- - - - -KPM-DLLEFRRRVACHYLETHGYPVQ  
Hvu-pble 317 KLYNQYMGGLDRADENIGQYQASICG-KKWYSSPLLFC-FEVILQNAWQLLHRTI-EE- - - - -KPLD-LLEFHRRRIASNYLETYGPPE  
Ppa-PGBD3 317 KVYNQFMGVDGRADENIDKYRASIRG-KKWYSSPLLFC-FELVLQNAWQLHKTY-DE- - - - -KPWD-FLEFRRRVVCHYLETHGHPPE  
Hsa-PGBD3 317 KVYNQFMGVDGRADENIDKYRASIRG-KKWYSSPLLFC-FELVLQNAWQLHKTY-DE- - - - -KPWD-FLEFRRRVVCHYLETHGHPPE  
Ota-pble 320 TL- - - - -  
Hsa-PGBD2 318 KLYQEKVGVGGRMDQNIACYKVKIRG-MKWYSSFIGYV-IDAALNNAWQLLHRICCD- - - - -AQVD-LLAFRRRYIACVYLESNADTTS  
Ppa-PGBD2 318 KLYQEKVGVGGRMDQNIACYKVKIRG-MKWYSSFIGYV-IDAALNNAWQLLHRICCD- - - - -AQVD-LLAFRRRYIACVYLESNADTTS  
Tma-PGBD2 318 RLYQEKVRGVGGRMDQNIACYKVKIRG-MKWYSSFIGYV-IDAALNNAWQLLHRICCD- - - - -AQVD-LLAFRRRYVACVYLESNADTSS  
Tma-PGBD1 315 KLYDECREGVAKMDQIISKYRVIRRS-KKWYSILVSYM-IDLAMNNAWQLLHRACNPG- - - - -ASLD-LLDFRRRCVAHFYLEHNAHLS  
Hsa-PGBD1 316 KVYDECKEGVAKMDQIISKYRVIRRS-KKWYSILVSYM-IDVAMNNAWQLLHRACNPG- - - - -ASLD-PLDFRRRFVAHFYLEHNAHLS  
Oaf-PGBD1 315 KLYDECREGVAKMDQIISKYRVIRRS-KKWYSILVSYM-IDVAMNNAWQLLHRACNPG- - - - -ASLD-LLDFRRRCVAHFYLEHNAHLS  
Nvi-pble 316 QAYNKIMGVDVDFDLREVYMIERRS-KKWWHSIMYYY-IDMAIVNCYILYKCYKEG- - - - -ECED-QLAFRIQLAKQLIGDYNGRKR  
Smi2-pble 331 AVYNDVMGVDVDFDQRKERYQIGRRS-VKWWHRIFYFL-LDLGIINSFILWQVNRN- - - - -RNL-DLQTFRIALARQLIDGYS-SRK  
Oaf-PGBD7 330 AEYNAIMGVDVDFDQSCERYAIGRRS-RKWWHRLHFL-VDLAIVNSFTMWNCH-G- - - - -GRCN-QLSFRLLALIRQLTVGRKRKR  
Cas-PGBD7 329 AEYNSIKGVDVDFDQRRERYAIGRRS-RKWWHRLHFL-IDLAIVNSFIMWNCN-HG- - - - -GRCN-QLSFRLLALSRLTVGRKRKR  
Laf-PGBD7 330 AEYNAIMGVDVDFDQRCERYAIGRRS-RKWWHRLHFL-IDLAIVNSFIMWNCN-HG- - - - -GRCN-QLSFRLLALSRLTVGQKRKR  
Cgi-pble 314 KLYNAYMNGVDHADQLRSTYNIARKS-LKWWKYLFL- - - - -YDVCIVNAFILMRESPNHGPRTKNRRVTRTQLEFRKVAHQLILFS- - - - -  
Bgl-pble 317 VYNSGMGVDLADQHRSYYPVGRVS-NKWWRYMLWYL-IDISMINSFLIMKKS- - - - -PNDSTDSLQNHLLFHKKVADQLLTA-TGVTL  
Pfl-pble 315 IDYNKFMGVDLSDQLATYYPGGK-HYKYWKYLFWFI-INRAICNAWIMYKIAN- - - - -PP- - - - -PRHRYR-QKDFRLDLSTQLVAGFTARKR  
Ola-PGBD9 336 LLYQENMRGVDLSDQLRECYQVGRPC-KKWWRYFLWFI-VNLCIVNAYIVMRESRGGAPPAGFN-GKQFTQRHFRVRLAQLI-GD-YQGA  
Hbu-PGBD9 339 LLYQENMRGVDLSDQLRECYQVGRPC-KKWWRYFLWFI-VNLCIVNAYIILRESRGGAPPAGFN-GKQFTQRHFRVRLAQLI-GD-YQGA  
Pny-PGBD9 339 LLYQENMRGVDLSDQLRECYQVGRPC-KKWWRYFLWFI-VNLCIVNAYIILRESRGGAPPAGFN-GKQFTQRHFRVRLAQLI-GD-YQGA  
Tcr-pble 315 KDYNQHMGYVDKADMLKSLYEISRKC-RKWWHRIFWHF-VDVALTNGFVIYALQSEG- - - - -THLS-LKKFRISVVDGLIGATQSSPR  
Bbe-PGBD5 329 QAYQNHICYIDKYNKFKSWYIISYKP-NKTWQQVFWLA-LSIAINNAWILYKLSPAY- - - - -QAQRYG-RAQFGERLVQQLRIPEANGP  
Pma-PGBD5 338 EAFAAHLGYICKYDDKYSRYFISHKP-NKTWQQVFWFA-LSIAINNAWILYKMSDAY- - - - -HVKRYS-RAQFGERLVRELLGLEDASPT  
Hsa-PGBD5 325 EAFAAHLSYICKYDDKYSRYFISHKP-NKTWQQVFWFA-LSIAINNAWILYKMSDAY- - - - -HVKRYS-RAQFGERLVRELLGLEDASPT  
Oaf-PGBD5 325 EAFAAHLSYICKYDDKYSRYFISHKP-NKTWQQVFWFA-LSIAINNAWILYKMSDAY- - - - -HVKRYS-RAQFGERLVRELLGLEDASPT  
Api1-pble 313 LDYNRCKSFIDLSDQMASYGSPLRKS-LKWYRKV-FELLNLSVVALCLFQKTTA- - - - -TRIK-ITDFRSNLIKYLTFKPNMNQE  
Api3-pble 315 VDYNSGKAGIDLSDQLSSYSTAVRKS-IRWYHKVATEILFGTAMVVALIVYNTINS- - - - -DKMK-ITQFRETLDVDTILGLDNQGPQ  
Atr1-pble 314 IDYNKAKAAVDLSDQMSAYSSPLRKT-LKWWKLGIELLNTAVVNAVLYESTTK- - - - -KKIS-VVNFRRLLAKQLIEGQENTG  
Psi-PGBD8 312 VDYNSKAFIDLSDQLKSYSCSLRRG-IKWFRLKLAIELITGSALVNSLVLYRVV-NK- - - - -KKIS-ITKFKEQVCLKLLQTDDETSTA  
Mmu-PGBD8 312 VDYNSKAFVDSLSDQLKSYSCSLRRG-IKWFRLKLAIELITGSALVNSLVLYRVV-NK- - - - -KKIS-ITKFKEQVCLKLLQTDDETSTV  
Dma-PGBD8 312 VDYNSKAFIDLSDQLKSYSCSLRRG-IKWFRLKLAIELITGSALVNSLVLYRVV-NK- - - - -KKIS-ITKFKEQVCLKLLQTDDETPTA  
Pva-pble 323 VDYNNKMGVVDLADQMLASYPTECKRHKFWYKFFRHL-LNITVLNSYILFKKDNPE- - - - -HTIS-HVNFRLTLIERMLEKHHKPGQ  
Oab1-pble 321 FDYNNKMGVVDMSDLSIIAYSTARKRLKYYKKIFLHL-LDVICLNSYLIYKMN- - - - -GKLS-RIHFLLLEYIEDTIASYPIESR  
Hsa-PGBD4 323 VDYNNEMGAVDSDQMLTSYPSERKRHKVYKFFHHL-LHITVLNSYILFKKDNPE- - - - -HTMS-HINFRLALIERMLEKHHKPGQ  
Uribo1 326 KDYSKHMGGVDKTDQIQTYYPDATRKT-RAWYKKAAYM-IQMALNSYVYKAAVPG- - - - -PKLS-YYNFLLQLLPAFLFGD- - - - -VQE  
Uribo2 326 KEYSKYMGGVDRTDQLQHYYNATRKT-RAWYKKGVIYL-IQMALNSYIVYKAAVPG- - - - -PKLS-YYKYQLQILPALLFGGVVEEQT  
Pxl1-pble 319 VDYNNLMGSDVDMVDMVLSAINSCRKS-LKWYKKYFFHL-LDMSIYNSYILYQOVTN- - - - -KCLK-YSKPHLILIKQILQKYPQENK  
Xtr-PGBD6 327 KEYSRHIDGVNKTDDQIQYY-NAARKT-KAWYKKAAYM-IQMALNSYVYKATVPG- - - - -PKLS-FYNYQVQLLPSLLFGD- - - - -VEE

#### Supplementary data 4 : Transposon donor sequences and primers used in the study.

a. Sequence of the *Ifp2-TIR5'-NeoR-TIR3* donor (the cassette containing the promoter SV40 - NeoR ORF - sv40 terminator is highlighted in yellow)

```
TTAACCCCTAGAAAGATAATCATATTTGTGACGTACGTTAAAGATAATCATGCGTAAAAATTGACGCAT
GTGTTTTATCGGTCTGTATATCGAGGTTTATTTATTAATTTGAATAGATATTAAGTTTTATTATAT
TTACACTTACATACTAATAATAAAATTCACAAACAATTTATTTATGTTTATTTATTTATTAAAAAA
AAACAAAAACTCAAATTTCTTCTATAAAGTAACAAAACTTTTGGTATCGATGTTCGACGAATTC TG
TGAATGTGTGTCAGTTAGGGTGTGGAAAGTCCCCAGCTCCCCAGGCAGGCAGAAGTATGCAAAGC
ATGCATCTCAATTAGTCAGCAACCAGGTGTGGAAAGTCCCCAGGCTCCCCAGCAGGCAGAAGTATG
CAAAGCATGCATCTCAATTAGTCAGCAACCATAGTCCCGCCCCTAACTCCGCCCATCCCGCCCCTA
ACTCCGCCCAGTTCCGCCCATTTCTCCGCCCATGGCTGACTAATTTTTTTTTTATTTATGCAGAGGCC
GAGGCCGCCTCGGCCTCTGAGCTATTCCAGAAGTAGTGAGGAGGCTTTTTTTGGAGGCCTAGGCTTT
TGCAAAAAGCTCCCGGGAGCTTGGATATCCATTTTCGGATCTGATCAAGAGACAGGATGAGGATCG
TTTTCGCATGATTGAACAAGATGGATTGCACGCAGGTTCTCCGGCCGCTTGGGTGGAGAGGCTATTC
GGCTATGACTGGGCACAACAGACAATCGGCTGCTCTGATGCCGCCGTGTTCCGGCTGTCAGCGCAG
GGGCGCCCGGTTCTTTTTGTCAAGACCGACCTGTCCGGTGCCCTGAATGAAGTGCAGGACGAGGCA
GCGCGGCTATCGTGGCTGGCCACGACGGGCGTTCCTTGCGCAGCTGTGCTCGACGTTGTCACGTGAA
GCGGGAAGGGACTGGCTGCTATTGGGCGAAGTGCCGGGGCAGGATCTCCTGTATCTCACCTTGCT
CCTGCCGAGAAAGTATCCATCATGGCTGATGCAATGCGGCGGCTGCATACGCTTGATCCGGCTACC
TGCCCATTCGACCACCAAGCGAAACATCGCATCGAGCGAGCACGTACTCGGATGGAAGCCGGTCTT
GTCGATCAGGATGATCTGGACGAAGAGCATCAGGGGCTCGCGCCAGCCGAAGTGTTCGCCAGGCTC
AAGGCGCGCATGCCGACGGCGAGGATCTCGTCTGACCCATGGCGATGCCTGCTTGCCGAATATC
ATGGTGGAAAATGGCCGCTTTTCTGGATTCATCGACTGTGGCCGGCTGGGTGTGGCGGACCGCTAT
CAGGACATAGCGTTGGCTACCCGTGATATTGCTGAAGAGCTTGGCGGGCAATGGGCTGACCGCTTC
CTCGTGCTTTACGGTATCGCCGCTCCCGATTTCGCAGCGCATCGCCTTCTATCGCCTTCTTGACGAG
TTCTTCTGAGCGGGACTCTGGGGTTCGAAATGACCGACCAAGCGACGCCAACCTGCCATCACGAG
ATTTTCGATTCCACCGCCGCCTTCTATGAAAGGTTGGGCTTCGGAATCGTTTTTCCGGGACGCCGGCT
GGATGATCCTCCAGCGCGGGGATCTCATGCTGGAGTTCTTCGCCACCCCAACTTGTATTATGCAG
CTTATAATGGTTACAAATAAAGCAATAGCATCACAAATTTACAAATAAAGCATTTTTTTTCACTGC
ATTCTAGTTGTGGTTTGTCCAAACTCATCAATGTATCTTATCATGTCTGGATCCCCAgctagcTGG
CTCGAGCAATTGGCAGATCTAAGCTTTGATATCTATAACAAGAAAATATATATATAATAAGTTATCA
CGTAAGTAGAACATGAAATAACAATATAAATTATCGTATGAGTTAAATCTTAAAGTCACGTAAAAG
ATAATCATGCGTCATTTTGACTCACGCGGTCGTTATAGTTCAAATCAGTGACACTTACCGCATTG
ACAAGCACGCCTCACGGGAGCTCCAAGCGGCGACTGAGATGTCTAAATGCACAGCGACGGATTCCG
CGCTATTTAGAAAGAGAGCAATATTTCAAGAATGCATGCGTCAATTTTACGCAGACTATCTTTC
TAGGGTTAACCGCGGTGGAGCTCCAGCTTTTGTTCCTTTAGTGAGGGTTAA
```

b. *Ter-pble-TIR5'-NeoR-TIR3* donor (the cassette containing the promoter SV40 - NeoR ORF - sv40 terminator is highlighted in yellow)

```
TTAACCCCTTTGAAGCACACATTAAGGATTTAATTTATTTTTTAATTTTTTACAATGAAAACCTATTT
CTAAATACATTTAAAATTTAATTTGAGCAAAAATAAAATGTTTTTCATTAATATTGAGTGTGCTAA
AAAATGGTGGTCATTCAGTGAACCACTATGCAACTAAGCTTCACTATATTTTTTACATGGTGTGGT
ATGCTACAAAGCAATTTTTAGATTCATTGAGACACAATGCCACTTCGCATGCTTTACAAGACCATT
TACTTCGGTGTGGCTGTAACCTTCTGTGCTGCAGTGGGTTAACATGAATTCGTGGAATGTGTGTCA
GTTAGGGTGTGGAAAGTCCCCAGCTCCCCAGGCAGGCAGAAGTATGCAAAGCATGCATCTCAATTA
GTCAGCAACCAGGTGTGGAAAGTCCCCAGGCTCCCCAGCAGGCAGAAGTATGCAAAGCATGCATCT
CAATTAGTCAGCAACCATAGTCCCGCCCCTAACTCCGCCCATCCCGCCCCTAACTCCGCCCAGTTC
CGCCCATTTCTCCGCCCATGGCTGACTAATTTTTTTTTTATTTATGCAGAGGCCGAGGCCGCCTCGGC
CTCTGAGCTATTCCAGAAGTAGTGAGGAGGCTTTTTTTGGAGGCCTAGGCTTTTGCAAAAAGCTCCC
GGGAGCTTGGATATCCATTTTCGGATCTGATCAAGAGACAGGATGAGGATCGTTTCGCATGATTGA
ACAAGATGGATTGCACGCAGGTTCTCCGGCCGCTTGGGTGGAGAGGCTATTCGGCTATGACTGGGC
```

ACAACAGACAATCGGCTGCTCTGATGCCGCCGTGTTCCGGCTGTCAGCGCAGGGGCGCCCGGTTCT  
TTTTGTCAAGACCGACCTGTCCGGTGCCCTGAATGAACTGCAGGACGAGGCAGCGCGGCTATCGTG  
GCTGGCCACGACGGGCGTTCCTTGCGCAGCTGTGCTCGACGTTGTACTGAAGCGGGAAGGGACTG  
GCTGCTATTGGGCGAAGTGCCGGGCGAGGATCTCCTGTCATCTCACCTTGCTCCTGCCGAGAAAGT  
ATCCATCATGGCTGATGCAATGCGGCGGCTGCATACGCTTGATCCGGCTACCTGCCCATTCGACCA  
CCAAGCGAAACATCGCATCGAGCGAGCACGTA CTGGATGGAAGCCGGTCTTGTTCGATCAGGATGA  
TCTGGACGAAGAGCATCAGGGGCTCGCGCCAGCCGAACTGTTCCGAGGCTCAAGGCGCGCATGCC  
CGACGGCGAGGATCTCGTCGTGACCCATGGCGATGCCTGCTTGCCGAATATCATGGTGGAAAATGG  
CCGCTTTTCTGGATTCATCGACTGTGGCCGGCTGGGTGTGGCGGACCGCTATCAGGACATAGCGTT  
GGCTACCCGTGATATTGCTGAAGAGCTTGCGGCGAATGGGCTGACCGCTTCCTCGTGCTTTACGG  
TATCGCCGCTCCCGATTTCGACGCGCATCGCCTTCTATCGCCTTCTTGACGAGTTCTTCTGAGCGGG  
ACTCTGGGGTTCGAAATGACCGACCAAGCGACGCCAACCTGCCATCACGAGATTTTCGATTCACC  
GCCGCCTTCTATGAAAGGTGGGCTTCGGAATCGTTTTCCGGGACCGCGGCTGGATGATCCTCCAG  
CGCGGGGATCTCATGCTGGAGTTCTTCGCCACCCCAACTTGTTTATTGCAGCTTATAATGGTTAC  
AAATAAAGCAATAGCATCACAAATTTACAAATAAAGCATTTTTTTCACTGCATTCTAGTTGTGGT  
TTGTCCAAACTCATCAATGTATCTTATCATGTCTGGATCCACGTGACAATAGTATTAAATAATGA  
TTTGAATACTTAGGGCTACATAGTTATATATTTATTCCTTGAAAAATATAACAAAACCAATTAGA  
AGAAACGTGTCACCTCAATAACAAAACAAAATACATACTATATTGGAGGCATGAATACCAACAAA  
AATTACTAATAATAAATTTTTACAAGAATAAACTAGCAAATAAATTCAGATAGATGATTCATAAG  
TGCTGCCATACAGTTAAATGTATCTCAAATAAATAAAGGTGGTTACCAAGTGAAACCACTA  
TGCTTCAAAGGGTTAA

**c. Sequences used as baits to identify transposon breakpoints in analyses done with lumpy.**

**Sequence of the *Ifp2-TIR5'-NeoR-TIR3* sequence flanked upstream and downstream by 100-bp plasmid regions.** The cassette containing the promoter SV40 - NeoR ORF - sv40 terminator was highlighted in yellow. TTA TSD were bolded while 100-bp plasmid backbone sequences were typed in blue.

ATTAAGTTGGGTAACGCCAGGGTTTTCCAGTCACGACGTTGTAAAACGACGGCCAGTGAGCGCGC  
GTAATACGACTCACTATAGGGCGAATTGGGTACC**TTAAC**CCCTAGAAAGATAATCATATTGTGACGT  
ACGTTAAAGATAATCATGCGTAAAATTGACGCATGTGTTTTATCGGCTGTATATCGAGGTTTATT  
TATTAATTTGAATAGATATTAAGTTTTATTTATTTTACACTTACATACTAATAATAAATTCACAA  
ACAATTTATTTATGTTTATTTATTTATTTAAAAAAAACAAAACCTCAAATTTCTTCTATAAAGTA  
ACAAAACCTTTTGGTATCGATGTCGACGAATTCTGTGGAATGTGTGTGTCAGTTAGGGTGTGGAAAGTC  
CCCAGCTCCCCAGGCAGGCAGAAGTATGCAAAGCATGCATCTCAATTAGTCAGCAACCAGGTGTGG  
AAAGTCCCCAGGCTCCCCAGCAGGCAGAAGTATGCAAAGCATGCATCTCAATTAGTCAGCAACCAT  
AGTCCCGCCCCTAACTCCGCCATCCCGCCCCTAACTCCGCCAGTTCCGCCATTCTCCGCCCA  
TGGCTGACTAATTTTTTTTTATTTATGCAGAGGCCGAGGCCGCTCGGCCTCTGAGCTATTCCAGAA  
GTAGTGAGGAGGCTTTTTTGGAGGCCTAGGCTTTTGCAAAAAGCTCCCGGGAGCTTGGATATCCAT  
TTTCGGATCTGATCAAGAGACAGGATGAGGATCGTTTCGCATGATTGAACAAGATGGATTGCACGC  
AGGTTCTCCGGCCGCTTGGGTGGAGAGGCTATTCGGCTATGACTGGGCACAACAGACAATCGGCTG  
CTCTGATGCCGCCGTGTTCCGGCTGTCAGCGCAGGGGCGCCCGGTTCTTTTTGTCAAGACCGACCT  
GTCCGGTGCCCTGAATGAACTGCAGGACGAGGCAGCGCGGCTATCGTGGCTGGCCACGACGGGCGT  
TCCTTGCGCAGCTGTGCTCGACGTTGTACTGAAGCGGGAAGGGACTGGCTGCTATTGGGCGAAGT  
GCCGGGGCAGGATCTCCTGTCATCTCACCTTGCTCCTGCCGAGAAAGTATCCATCATGGCTGATGC  
AATGCGGCGGCTGCATACGCTTGATCCGGCTACCTGCCCATTCGACCACCAAGCGAAACATCGCAT  
CGAGCGAGCACGTA CTGGATGGAAGCCGGTCTTGTTCGATCAGGATGATCTGGACGAAGAGCATCA  
GGGGCTCGCGCCAGCCGAACTGTTCCGAGGCTCAAGGCGCGCATGCCCGACGGCGAGGATCTCGT  
CGTGACCCATGGCGATGCCTGCTTGCCGAATATCATGGTGGAAAATGGCCGCTTTTCTGGATTCAT  
CGACTGTGGCCGGCTGGGTGTGGCGGACCGCTATCAGGACATAGCGTTGGCTACCCGTGATATTGC  
TGAAGAGCTTGGCGGCGAATGGGCTGACCGCTTCCTCGTGCTTTACGGTATCGCCGCTCCCGATT  
GCAGCGCATCGCCTTCTATCGCCTTCTTGACGAGTTCTTCTGAGCGGGACTCTGGGGTTCGAAATG  
ACCGACCAAGCGACGCCAACCTGCCATCACGAGATTTTCGATTCACCGCCGCTTCTATGAAAGG

TTGGGCTTCGGAATCGTTTTCCGGGACGCCGGCTGGATGATCCTCCAGCGCGGGGATCTCATGCTG  
GAGTTCCTTCGCCACCCCAACTTGTTTATTGCAGCTTATAATGGTTACAAATAAAGCAATAGCATC  
ACAAATTTACAAATAAAGCATTTTTTTTCACTGCATTCTAGTTGTGGTTTGTCCAAACTCATCAAT  
GTATCTTATCATGTCTGGATCCCCAgctagcTGGCTCGAGCAATTGGCAGATCTAAGCTTGATATC  
TATAACAAGAAAATATATATATAATAAGTTATCACGTAAGTAGAACATGAAATAACAATATAATTA  
TCGTATGAGTTAAATCTTAAAAGTCACGTAAAAGATAATCATGCGTCATTTTACTCACGCGGTCCG  
TTATAGTTCAAATCAGTGACACTTACCGCATTGACAAGCACGCCTCACGGGAGCTCCAAGCGGCG  
ACTGAGATGTCCTAAATGCACAGCGACGGATTTCGCGCTATTTAGAAAGAGAGAGCAATATTTCAAG  
AATGCATGCGTCAATTTTACGCAGACTATCTTTCTAGGG**TTAACCGCGGTGGAGCTCCAGCTTTTG**  
**TTCCCTTTAGTGAGGGTTAATTGCGCGCTTGGCGTAATCATGGTCATAGCTGTTTCTGTGTGAAA**  
**TTGTTATCCGCT**

Sequence of the *Ter-pble-TIR5'*--*TIR3* sequence flanked upstream and downstream by 100-bp plasmid regions. TTAA TSD were bolded while 100-bp plasmid backbone sequences were typed in blue.

CGTTGTAAAACGACGGCCAGTGAGCGCGCGTAATACGACTCACTATAGGGCGAATTGGGTACGGCC  
GTCAAGGCCAAGCTTCCCGGGATACTTACCATGG**TTAAC**CCCTTTGAAGCACACATTAAGGATTTAA  
TTTTATTTTTAATTTTTTTACAATGAAAACCTTATTTCTAAATACATTTAAAATTTAATTTGAGCAAAA  
ATAAAATGTTTTTCATTAATATTGAGTGTGCTAAAAAATGGTGGTCATTCAGTGAAACCACTATGC  
AACTAAGCTTCACTATATTTTTACATGGTGTGGTATGCTACAAAGCAATTTTTAGATTCATTGAGA  
CACAATGCCACTTCGCATGTCTTACAAGACCATTACTTCGGTGTGGCTGTAACCTCTGTGCTGCA  
GTGGGTAAACATGAATTCGAGCTCGGATCCACGTGACAATAGTATTAATAATGATTTGAATACT  
TAGGGCCTACATAGTTATATATTTATTCCTTGAAAAATATAACAAAACCAATTAGAAGAAACGTGT  
CACTTCAATAACAAAAACAAAATACATACTATATTTGGAGGCATGAATACCAACAAAATTACTAAT  
AATAAATTTTTACAAGAATAAACTAGCAAATAAATTCAGATAGATGATTCATAAGTGCTGCCATA  
CAGTTAAATGTATCTCAAATAATTAATAAAAGGTGGTTACCAAGTGAAACCACTATGCTTCAAAG  
GG**TTAACTCGAGTAAGTATCACGTGAAGCTTTGCAAGCTCCAGCTTTTGTTCCTTTAGTGAGGGT**  
**TAATTGCGCGCTTGGCGTAATCATGGTCATAGCTGTTTCC**

Sequence of the *Ifp2-TIR5'*-*NeoR-TIR3* sequence flanked upstream and downstream by 100-bp plasmid regions. This sequence was that contained in the *Ifp2* plasmid construct used in Henssen et al, 2015 to monitor integration assays in HEK293 cells. The cassette containing the promoter EF1 - NeoR ORF - sv40 terminator was highlighted in yellow. TTAA TSD were bolded while 100-bp plasmid backbone sequences were typed in blue.

TTGAACCCGTGGAGGACGGGACGACTCGCGGTGCAAATGTGTTTTACAGCGTGATGGAGCAGATGA  
AGATGCTCGACACGCTGCAGAACACGCAGCTAGAT**TTAAC**CCCTAGAAAGATAATCATATTGTGACGT  
ACGTTAAAGATAATCATGTGTAATAATTGACGCATGTGTTTTATCGGTCTGTATATCGAGGTTTATT  
TATTAATTTGAATAGATATTAAGTTTTATTATTTTACACTTACATACTAATAATAAATTTCAACAA  
ACAATTTATTTATGTTTTATTTATTTATTTAAAAAAAACAAAACCTC**AAAATTTCTTCTATAAAGTAA**  
**CAAACTTTTATGAGGGACAGCCCCCCCCAAAGCCCCCAGGGATGTAATTACGTCCCTCCCCCGC**  
**TAGGGGGCAGCAGCGAGCCCGGGGCTCCGCTCCGGTCCGGCGCTCCCCCGCATCCCCGAGCC**  
**GGCAGCGTGCGGGGACAGCCCGGGCACGGGAAGGTGGCACGGGATCGCTTTCCTCTGAACGCTTC**  
**TCGCTGCTCTTTGAGCCTGCAGACACCTGGGGGATACGGGGAAAAGGCCTCCACgGCCaaggatc**  
**tgcgatcgcctccggtgcccgcagtgggcagagcgcacatcgcccacagtccccgagaagttgggg**  
**ggaggggtcggcaattgaacgggtgcctagagaaggtggcgcggggtaaacgaggaaagtgatgctc**  
**gtgtactggctccgctttttcccaggggtgggggagaaccgtatataagtgcagtagtcgcccgtg**  
**aacgctctttttcgcaacgggtttgcccgcagaacacagctgaagcttcgaggggctcgcactctc**  
**ccttcacgcgcccgcgcccctacctgaggccgccatccacgcccgttgagtcgcttctgccgctc**  
**cccgcctgtggtgcctcctgaactgcgtccgcccgtctaggttaagtttaagctcaggtcagagaccg**  
**ggcctttgtccggcgctcccttgagcctacctagactcagccggctctccacgctttgcctgacc**  
**ctgcttgctcaactctacgtctttgtttcgttttctgttctgcgcccgttacagatccaagctgtga**  
**ccggcgccctactctagagctagcgaattcgaatttaaatcggatccGCGGCCGCgcccctctcct**

ccccccccctaactggtactggccgaagccgcttgggaataaggccgggtgtgcggtttgtctatatgt  
tattttccaccatattgcccgtcttttggcaatgtgagggcccggaaacctggccctgtcttcttga  
cgagcattcctaggggtctttcccCtctcgcCAAaggaatgcaaggtctggtgaatgtcgtgaagg  
aagcagttcctctggaagcttcttgaagacaacaacgtctgTagcgacccttgcaggcagcga  
acccccacctggcgacaggtgacctctgcggccaaaagccacgtgtataagatacacctgCaaagg  
cggcacaaccccagtgccacgttgtgagttggatagttgtggaaagagtcaaattggctctcctcaa  
gcgtattcaacaAggggctgaaggatgccagaaggtaccccattgtatgggatctgatctggggc  
ctcgggtgcacatgctttacatgtgtttagtCgaggttaaaaaaacgtctaggccccccgaaccacg  
gggacgtggttttcctttgaaaaaCACGATGATAATATGGCCACAACCATGgcgtccggaATGATT  
GAACAAGATGGATTGCACGCAGGTTCTCCGGCCGCTTGGGTGGAGAGGCTATTCGGCTATGACTGG  
GCACAACAGACAATCGGCTGCTCTGATGCCGCCGTGTTCCGGCTGTCAGCGCAGGGGGCGCCCGGTT  
CTTTTTGTCAAGACCGACCTGTCCGGTGCCTGAATGAACTGCAGGACGAGGCAGCGCGGCTATCG  
TGGCTGGCCgCGACGGGCGTTCCTTGCGCAGCTGTGCTCGACGTTGTCACTGAAGCGGGAAGGGAC  
TGGCTGCTATTGGGCGAAGTGCCGGGGCAGGATCTCCTGTCACTCACCTTGCTCCTGCCGAGAAA  
GTATCCATCATGGCTGATGCAATGCGGCGGCTGCATACGCTTGATCCGGCTACCTGCCATTCGAC  
CACCAAGCGAAACATCGCATCGAGCGAGCACGTACTCGGATGGAAGCCGGTCTTGTGATCAGGAT  
GATCTGGACGAAGAGCATCAGGGGCTCGCGCCAGCCGAACTGTTCCGACAGGCTCAAGGCGCGCATG  
CCCGACGGCGAGGATCTCGTCGTGACCCATGGCGATGCCGTGCTTGCCGAATATCATGGTGGAAAAT  
GGCCGCTTTTCTGGATTCACTGACTGTGGCCGGCTGGGTGTGGCGGACCGCTATCAGGACATAGCG  
TTGGCTACCCGTGATATTGCTGAAGAGCTTGGCGGCGAATGGGCTGACCGCTTCTCGTGCTTTAC  
GGTATCGCCGCTCCCGATTTCGACGCGCATCGCCTTCTATCGCCTTCTTGACGAGTTCTTCTGAGtc  
gacaatcaacctctggattacaaaatttgtgaaagattgactggtattcttaactatggtgctcct  
tttacgctatgtggatacgtgctttaatgcctttgtateatgcGTTAACTaaactTGTTTATTGC  
AGCTTATAATGGTTACAAATAAAGCAATAGCATCACAAATTTACAAATAAAGCATTTTTTTTCACT  
GCATTCTAGTTGTGGTTTTGTCCAAACTCATCAATGTATCTTATCATGTCTGGAATTGACTCAAATG  
ATGTCAATTAGTCTATCAGAAGCTCATCTGGTCTCCCTTCCGGGGGACAAGACATCCCTGTTTAAAT  
ATTTAAACAGCAGTGTTCCTAAACTGGGTCTTATATCCCTTGCTCTGGTCAACCAGGTTGCAGGG  
TTTCTGTCTCACAGGAACGAAGTCCCTAAAGAAACAGTGGCAGCCAGGTTTAGCCCCGGAATTG  
ACTGGATTCTTTTTTAGGGCCCATTTGGTATGGCTTTTTCCCGTATCCCCCAGGTTGTCTGCAGG  
CTCAAAGAGCAGCGAGAAGCGTTCAGAGGAAAGCGATCCCGTGCCACCTTCCCCGTGCCCGGGCTG  
TCCCCGCACGCTGCCGGCTCGGGGATGCGGGGGGAGCGCCGGACCGGAGCGGAGCCCCGGGCGGCT  
CGCTGCTGCCCCCTAGCGGGGGAGGGACGTAATTACATCCCTGGGGGCTTTGGGGGGGGGCTGTCC  
CTGATATCTATAACAAGAAAATATATATAATAAGTTATCACGTAAGTAGAACATGAAATAACAA  
TATAATTATCGTATGAGTTAAATCTTAAAAGTCACGTAAGATAATCATGCGTCATTTTGACTCA  
CGCGGTGCTTATAGTTCAAATCAGTGACACTTACCGCATTGACAAGCACGCTCACGGGAGCTCC  
AAGCGGCGACTGAGATGTCCTAAATGCACAGCGACGGATTCGCGCTATTTAGAAAGAGAGCAAT  
ATTTCAAGAATGCATGCGTCAATTTTACGCAGACTATCTTTCTAGGGTTAATCTAGCTGCATCAGG  
ATCATATCGTCGGGTCTTTTTCCGGCTCAGTCATCGCCAAAGCTGGCGCTATCTGGGCATCGGG  
AGGAAGAAGCCCGTGCCTT

**d. Primers used to amplify the Mm524 cDNA by RT-PCR.**

Mm524 (Accession N°XM\_006530804.1)

Forward primer (flanked with *EcoRI*) : 5'-CCGAA**GAATTC**ATGGCCGAGGGCGGTGG-3'

Reverse primer (flanked with *XbaI*) : 5'-CCGTT**TCTAGAT**CAGTGGGCTGGCGATGAG-3'

**e. Primers to amplify loci containing *Ifp2* or *Ter-pble* insertions**

***First linear amplification (B = biotin)***

(B)-NeoR 5' : (B)-TTCTTCGCCACCCCAACTTGTTTATTGC-3'

(B)-NeoR 3' : (B)-GACTTTCCACACCCTAACTGACA-3'

***Linkers***

Oligo I : 5'-GACCCGGGAGATCTGAATTCAGTGGCACAGCAGTTAGG-3'

Oligo II DpnII : 5'-GATCCCTAACTGCTGTGCCACTGAATTCAGATC-3'

Oligo II PNB : 5'-CATGCCTAACTGCTGTGCCACTGAATTCAGATC-3'



***First round of nested PCR***

Primer anchored in linker

LC1 : 5'-GACCCGGGAGATCTGAATTC-3'

Primers anchored in the 5' or 3' end of the *IFP2* vector

(B)-TIR-UTR 5' PB III : (B)-CGATAAAACACATGCGTCAAT -3'

(B)-TIR-UTR 3' PB III : (B)-GCTATTTAGAAAGAGAGAGCA -3'

Primers anchored in the 5' or 3' end of the *Tcr-pble* vector

(B)-TIR-UTR 5'Tcr-pbleII : (B)-GTTTTTCATTAATATTGAGTGTTGC-3'

(B)-TIR-UTR 3'Tcr-pbleII : (B)-GCAGCACTTATGAATCATCTATC-3'

***Second round of nested PCR***

Primer anchored in linker

LC2 : 5'-GATCTGAATTCAGTGGCACAG-3'

Primers anchored in the 5' or 3' end of the *IFP2* vector

TIR-UTR PB 5'III : 5'-CGATAAAACACATGCGTCAAT -3'

TIR-UTR PB 3'III : 5'-GCTATTTAGAAAGAGAGAGCA-3'

Primers anchored in the 5' or 3' end of the *Tcr-pble* vector

TIR-UTR 3' Tcr-pble III : 5'-CACCTTTTATTTAATTATTTGAGATAC-3'

TIR-UTR 5'Trc-pble III : 5'-CAATGAAACTTATTTCTAAATAC-3'

>GFPT01020379.1

ttaaccctttgaagcacacattaaggatttaattttatTTTTTaaTTTTTacaatgaaaacttatttct  
aaatacatttaaaatTTAATTTGAGCAAAAATAA--TTTTT-  
cattaatattgagtggtgctaaaaaatggtggtcattcagtgaaaccactatgcaactaagcttact  
atatgtttacatggtggtatgcttcaaagcaatTTTTtagcttcattgagacacaatgccacttcgc  
atgtcctacaagaccatttacttcggtgtggctgtaacttc-  
gtgctgcagtgggcacaacgtctgcttgaactcc----  
ttacaggtaaagtagccaccttgtcaaactTTTTTcaagaggtacttgaggcttgaatatagctcact  
ggctttggaattggttttcttctcttaggtgaagattggtgtgcaccaatcaaaccatctactacaga  
aatacgaaatTTCTTTAGTGATAAATGGGTGCCCTCCTTTGGAGTGATAAATGACAAAGCCATTG  
TCAGTGCAACATCCACAAAGTGCCAAAATATACGGTGCCACCCTTGCGG--ATTTT----  
cggcttatttcgtatagggatt-  
caacatatcagctttatccacatagcccatgtgctgattgtaatctttcactagttgtggacaggtta  
ctatttgtattgttccatctttgttttttcttggcttcagaaataagcgaaggattgtggaaattg  
gacaaaaatgtaatacatttgttgtctttccacttttagccaagcaactcctgtaaattgaggtgcgaa  
ctcactatcacctttcttcatgttcttttcta---  
tcttttgttcttttggaagccagttctcacattccttactgttccgcatgcatatatcgcttggttc  
tttagtgaaatcattagatcaacacttgtaaataattgtcgaaataaacatgatgaccaacccaac  
aagttcaagagtaaggctttgacaactcgggcacctaataagcttctcaatattgccttcaaccttac  
ctgtgtatatttgaactgacagacaaacccgactcatccgcacgcacccaaacctttagcctcgt  
tttattggcttgttgggcataaattgtctgaaagaactcctcctttaaatttgatcatactttcatc  
gatggactgatgattccctggttgaagcaggttttgaagctctgaaagtgtatcaagcattggct  
ttagttttagagcttatcaaagcattgtcgtctctttttggctgcaatacattgttgtttacatgt  
aaatgcgtcaacaaccaacaaaacgattcactggcattaggggagagataaatgaatccctaagctg  
agggtaagatgaccaatggtccctgtaggagggtaaacgttttatccccatcataatgtttattgcta  
tga---  
aaatcttcatttcttcttcagttacagggacgaatggtttccccaactgtgtagcataaaggttagtt  
tgaaaaactaaatgttcaataaaaagaatctggaaataaacacaaaaaagtatcgacaggagattctgt  
acttgttggtagcatttagggccaaagtcaatttgaataatttgaatgttccaccgccttattttgttt  
cccacacaccatcta--atTTTTTaaatcgctcactaaggggttcatcatcatcatcatc-----  
tgtattacaatcttctgatttatatcagaataatttaggacattattgttattattgaaaccgttat  
cttctgtataaaaacaattgatctgtcctcactttcctgtaagcaatcttctaataatccgaatcacat  
tc----  
tccatcagaatcacactgtccatcaatagagtcagtatcactaggcacttctatttagcaaacgttcaa  
catcttctctttgagtgatagcttttagcaataattttcttttat-----  
ttatagacatgacgacactgaaatgagtaaaaatatacacatgaccttacttgcacagtggtagcaat  
ttgaaaccacctagtaattag---g--  
ttattaaattaatataatttagataaaatTTAATTATGAATGTAATAATTATAAAGCAAAAAATAATA  
GTATTAATAATGATTGAATACT-----  
tacatagttatataatttattccttgaaaaatataacaaaaccaattagaataaacgtgtcacttcaat  
aacaaaaacaaaatacatactatattggaggcatgaataccaacaaaaattactaataataaatttt  
acaagaataaaaactagcaataaattcagatagatgattcataagtgtgcca-  
acagttaaatgtgtctcaataattaaataaaaaggtggttaccaagtgaaccactatgcttcaaagg  
gtaa

>MSSY03005913.1b

ttaaccctttgaagcacacattaaggatttaattttatTTTTTaaTTTTTacaatgaaaacttatttct  
aaatacatttaaaatTTAATTTGAGCAAAAATAA--TTTTT-  
cattaatattgagtggtgctaaaaaatggtggtcattc-----  
-----  
-----  
-----  
-----  
-----  
-----

-----agtgaaaccactatgcttcaaagggttaa  
>MSSY03005238.1b  
ttaaccctttgaagcacacattaaggatttaattttatttttaattttttacaatgaaaacttatttct  
aaatacatttaaaatttaatttgagcaaaaataa--tgttt-  
cattaatattgagtgttgctaaaaaatggtggtcattcagtgaaaccac-----



aacaaactacatactatattatagggcatgaataccaacaaaaattactaataataaatttttacttga  
ataaaaactagcaataagttatgatagatgattaataagtgtcgca-  
acagttaaatgtattttcaataatgaaaggtggttactaggggaaaccactatgcttcaa-  
ggtttaa

>PGTA01000295.1

TTAACCCTTTTGAAGCACACATTAAGGATTTAATTAATTTTTAATTTTTTACAATGAAAACCTTATTTCT  
AAATACATCTAAAATTTAATTTGAGCAAAAATAA--TGTTT-  
CATTAATATTGAGTGTTGCTAAAAAATGGT----  
CATTCAAGTAAAAGCACTATGCAACTAAGCTTCACTATATGTTTACATGGTGTGGTATGCTACAAATCA  
ATTTTTAGATTCATTGAGACACAATGCCACTTCGCATGTCTTACAAGACCATTGCTTCGGTGTGGCT  
GTAACCTCT-TGCTGCAGTGGGCACAACGTCTGCTTGAACCTCC----  
TTACAGGTAATGAGCCACCTTGTCAAATCTTTTTCAATAGGTACTTGAGGCTTAAAATAGCTCACT  
GGCTTTGGAATTGGTTTTCTTCTCTAGGTGAAGATTGTGTTGCACCAATCAAACCATCTACTACAGA  
AATACGAAATTTCTTTAGTGATAAATGGGTGCCCTCACTTTGGAGTGCATAAATGACAAAAGCCATTG  
TCAGTGCACATCCACAAAAGTGCCAAAATATACGGTGCCACCACCTTGCGGC--  
ATTTCTTCCGGCTTATTTCTGTATAGGGATTTTCAACATATCAGCTTTATCCACATAGCCCATGTGCT  
GGTTGTAATCTTTCAGTAGTGTGGACAGGTTACTATTTGTATTGTTCCATCTTGTTTTTTCTCTTG  
GCTTCAGAAATAAGCGAAGGATTGTGGAAACTGGAGAAAAATGTAATACATTTGTTGCTTTCCACTT  
TAGCCAAGCAACTCCTGTAATGATGTGCGAAACTCACTATCACCTTTCTTCATGTTCTTTTCTACC-  
--

TTTTGTTCTTTTGGCAAGCCAGTTATCACATTCCTTACTGTGCCGCATGCATATATCGCTTGGTTCTT  
TAGTGAAATCATTAGATCAACACTTGTAATAAATTGTCGAAATAAACATGATGACCCAACCCAAAA  
GTCCAAAAGTAAAGTCTTTGACAACCTTGAACACTTCAATAGCTTCTCAATATTGCCTTCAACCTTACCT  
GTGTATATTTGAAACTGACAGATAAACCCTGACTCATCCGCACGCACCCACACCTTGTAGCCTCGTTT  
TATTGGCTTGTGGCATAAATTGTCTGAAAGAACTCCTTCTTTAAATTTGATCATACTTTCATCAA  
TGGACTGATGTTTTCTGGTTTGAAGCAGGTTTTGAAAGTCTCTGAAAGTGATCAAGCATTGGTCTT  
AGTTTGTAGAGCTTATCAAAGCATTGTGCTCTTTTTGGCTGCAATACATTGTTGTTTACATGTAA  
ATGCGTCAACAACCAACCAAAAACGATTCACTGCCATTAGGGGAGAGATAAATGAATCCCTAAGCTGAG  
GGTAAGATGACCAATGGTACCTGTAGGAGGGTAAACGTTTTATTCCCATCATTATGTTTATTGCTATG  
A---

AAATTTTCATTTCTTCTTCAGTTACA-----  
-----  
-----  
-----  
-----  
-----  
-----  
-----  
-----  
-----  
-----  
-----  
-----  
-----  
-----  
-----  
-----  
-----  
-----  
-----  
-----

>PGTA01003554

TTAACCCTTTTGAAGCACACATTAAGGATTTAATTTATTTTTATTTTTTTGCTATGAAAACCTTATTTCT  
AAATACATTTCAAATTTAATTTTAGCAAAAAATAAAGTTTTTCATTGAGATTGAGTGGTCTAAAAA  
TGGTGGTCTTTAGTAAAACCACTATTCAAATAAATTCAGTATATTTTTACATGGTGTGGTATGCTA  
CAAAGCAATTTTATATTCATTGAGACACAATGCCACTTCGCATGTCTTACAAGACCATTTACTTCGG  
TGTGGCTGTAACCTCT-TGCTGCAGTGGGCACAACGTCTGCTTGAACCTCC----  
TTACAGGTAATGAGCCACCTTGTCAAATCTTTTTTCAAGAGGTACTTGAGGCTTAAAATAGCTCACT  
GGCTTTGGAAGTGGTTTTTCTTACTCCAGGTGAAGATTGTGTTGCACCAATCAATCCATCTACTACAGA  
AAT--GA-----GA--

AATGGGAGCCCTCACTTTAGAGTGCATAAATTACAAGGCCATTTGACAGTGCAACACCCACAAAGTGT  
CAGAATATACGATGCGG-CATTTCCGGCTTATTTCC-----  
AACATATCAGCTTTATCCACATAGCCCATGACTGGTTGTAATCTTTCACTAGTTGTGGA-----  
CC---  
TGTATTGTTCCATCTTCGTTTTTCTCTTGACTTCAGAAATAAGCGAGGGATTGTGGGAATT-----  
-----  
ACATTTGTTGTCTTTCCACTTTAGCCAAGCAACTCCCGTAAATTAAGTGTGAAACTCACTATCACCTT  
TCTTCGTGTTCTTTTCTACC---  
TTTTGTTCTTTTGGCAAGCTGGTTCTCACATTCATCACTGTGCCGCATGCATGTATCGATTGGTTCTT  
TAGTGAAATAATTGAATCAACACTTATAAAAATAGTTGTC---  
ATAAACATCATGACCCAAACCAAAAAGTTCAAAGTTAGACCTTTGGCAACTCGAGCACCTAATAGTT  
TCTCAATATTGCCCTCAACCTTCCCTATGTATATCTGAAACTGAC-----  
TTACCCGCACGCACCCACACCTTGTAGCCTCGTTTTATTGGATTGTTGGGCATAGATTGTCTGAAAGA  
ACTCCTTCCTTTAAATATGATCATACTTCCATCAATGGACTGATGTTTTCTGGTTTGAAGCAGGTTA  
TGAAAGTCACTGAAAGTGTATCAAGAATTGGTCGTAGTTTGTAGAGTTTGTCAAATGCATTGTCTCCT  
CTTTTTAGCT-  
TAATACTTTGTTGTTTACATGTAAATGTGTCAACAACCAACCAAAAACGATTCACTGGCATCAGGGGAG  
AGATAAATGTATCCCTAAGCTGAGGTTGATATGACCAATGGTCCCTTTAGGAGGGTAAACGTTTTATC  
CCCATCATAATGTTTATTATTATGA---  
AAATTTTTCATTTATTCTGCAGTTACAAGGATGAATAGTTTCCCCATCTGTGTAGAGTAAAGGTAAGTT  
TGAAAACTAAAGGTTCACTGAAAGAATCTGGATATAAACACAAAAAAGTATTGACAGGAGATTCTGT  
ACTTGTGGTACATTAGGGCCAAAGTCATTTGTCAAATTTTGAATGTTCCACCACATTATTTTGT  
CCCACAAACCATATA-TTTTTTAAATCCCTCACTAAGTGGTTCATCATCATCATCAT-----  
ATTTATTACTATCTTCTGACTTACATCAGAATAATTTAGGACATTATTGTCATTATTGAACCCGTCA  
TCTTCTGTATAAAAAACACTTGATCTGTCCTCACTTTCTGTAAGCAATCTTCTCCTTA-  
GAATCACACTCACCTTCC-----  
ATAGAGTCAGTATCCCTAGGCACTTCTACTAGCAAACGTTCAACATCTTCTCTTTGAGTGATAGACT  
AAGTTTAGCAATCATTTTATTTTA-----TTTATAGACATGAC---  
ACTGAAATGATTACAAATATGCACACAGCTTAACTCGCACAAATGGTAGCAATTTGAAGCCACCTAGTA  
ATTAG-----TTTATTTAAATATAT-TATATAT-  
TATATATATATTT-----  
-----  
-----  
-----  
-----

>PGFK01000005.1

TTAACCTTTTGAAGCACACATTAAGGATTTAATTTATTTTTATTTTTTGTCTATGAAAACCTTATTTCT  
AAATACATTTCAAATTTAATTTTAGCAAAAAAATAAAGTTTTTCATTGAGATTGAGTGTGCTAAAAA  
TTGTGGTCTTTCAGTAAAACCACTATTCAAATAAATTTCAATATATTTTTACATGGTGTGGTATGCTA  
CAAAGCAATTTTATATTGAGACACAATGCCACTTCGCATGTCTTACAAGACCATTTACTTCGG  
TGTGGCTGTAACCTTCT-  
TGCTGCAGTGGGCACAACGCTGCTTGAACCTCCCTCCTTACAGGTAATGAGCTACCTTGCCAATCT  
TTTTTCAAGAGGTACTTGAGGCTTGAATAGCTCACTGGCTTTGGAAGTGGTTTTCTTACTCCAGGTG  
AAGATTGTGTTGCACCAATCAATCCATCTACTACAGAAATGAGAAAT-----  
GGGAGCCCTCACTTTAGAGTGCATAAATTACAAGGCCATTTGACAGTGCAACACCCACAAAGTGTGAG  
AATATACGATGCGG-CATTTCCGGCTTATTTCC-----  
AACATATCAGCTTTATCCACATAGCCCATGACTGGTTGTAATCTTTCACTAGTTGTGGA-----  
C--  
CTGTATTGTTCCATCTTCGTTTTTCTCTTGACTTCAGAAATAAGCGAGGGATTGTGGGAATT-----  
-----  
ACATTTGTTGTCTTTCCACTTTAGCCAAGCAACTCCCGTAAATTAAGTGTGAAACTCACTATCACCTT  
TCTTCGTGTTCTTTTCTACC---  
TTTTGTTCTTTTGGCAAGCTGGTTCTCACATTCCTCACTGTGCCGCATGCATGTATCGATTGGTTCTT  
TAGTGAAATAATTGAATCAACACTTATAAAAATAGTTGTC---

ATAAACATCATGACCCAAACCAAAAAGTTCAAAGTTAGACCTTTGGCAACTCGAGCACCTAATAGTT  
TCTCAATATTGTCCTCAACCTCCCTATGTATATCTGAAACTGAC-----  
TTACCCGCACGCACCCACACCTTGTAGCCTCGTTTTATTGGATTGTTGGGCATAGATTGTCTGAAAGA  
ACTCCTTCCTTTAAATATGATCATACTCCATCAATGGACTGATGTTTTCTGGTTTGAAGCAGGTTA  
TGAAAGTCACTGAAAGTGTATCAAGAATTGGTCGTAGTTTGTAGAGTTTGTCAAATGCATTGTCTCCT  
CTTTTTAGCT-  
TAATACTTTGTTGTTTACATGTAAATGTGTCAACAACCAACCAAAAACGATTCACTGGCATCAGGGGAG  
AGATAAATGTATCCCTAAGCTGAGGTTGATATGACCAATGGCCCTTTAGGAGGGTAAACGTTTTATC  
CCCATCATAATGTTTATTATTATGA----  
AAATTTTCATTTATTCTGCAGTTACAAGGATGAATAGTTTCCCATCTGTGTAGAGTAAAGGTAAGTT  
TGAAAACTAAATGTTCACTGAAAGAATCTGGATATAAACACAAAAAAGTATTGACAGGAGATTCTGT  
ACTTGTGGTACATTAGGGCCAAAGTCATTTGTCAAATTTTGAATGTTCCACCACATTATTTGTTTT  
CCCAAAAACCATATATATTTTTTAAATCCCTACTAAGTGGTTCATAATCATCATAATCATCATA  
TTTATTACTATCTTCTGACTTACATCAGAATAATTTAGGACATTATTGTCATTATTGAACCCGTCAT  
CTTCTGTATAAAAACACTTGATCTGTCTCCTCACTTTCCTGTAAGCAATCTTCTCCTA-  
GAATCACACTCACCTTCC-----  
ATAGAGTCAGTATCCCTAGGCACTTCAACTAGCAAACGTTCAACATCTTCTCTTTGAGTGATAAGTT  
TAG-----CAATCATTTTATTTTA-----TTTATAGACATGAC----  
ACTGAAATGATTACAAATATGCACACAGCTTAACTCGACAATGGTAGCAATTTGAAGCCACCTAGTA  
ATTAG-----TTTATTTAAATATAT-TATATAT-  
TATATA-----  
-----  
-----  
-----  
-----  
-----

>MSSY03008721

TCAGCCCTTTGACGCACACATTAAGGA--  
TAATTTATTTTTATCTTTTTACAATTAACCTTATTTCTAAATACATTTAAAATTTTATTTTAGCAA  
--TAATATGTTT-CATTAAGATCGAGTGTGCTAAAAAATGGTG-----  
AAACCACTATGCAACTAAGCTCCACTATATTTTTACATGGTGTGGTATGCTACAAAGCAATTTTTAGA  
NTCGTTGAGAAACAATGCAACTTCGCATTTCTTACAAGACCATTTACTTCGGTGTGGCTGTAACCTC-  
GTGCTGCAGTGGGCACAACGTCTGCTTGAACCTC-----  
TTACAGGTAATGAGCTACTTTTCAAATCTTTTTTCAAGAGGTAICTCGAGACTGAAAATAGCTCACT  
GGCTTTGGAATTGGTTTTCTTCTCTAGGTGAAGTTTTGTTGGACTAATCAATTCATCTACTACAGA  
AATACGAAATTCCTTTAGTGATAAATGGGAGCCCTCACTTTAGAGTGCATAAATGACAAAACCATTTG  
TCAGTGAACATCCACAAAGTGCCAAAATATACGGTGCCATCATTTGCGGCTTATTTT-----  
-----GTAAAGGGATTTT-  
AACATATCAGCTTTATCCACATAGCCCATGTGCTGGTTATAATCTTTTATTAGTTATGGACAGACTAC  
CATCTGTATTATCCATCTTTGTTTTTTCTCTTGCTTCATAAATAAGCGAAGGATTGCGGAAATTGG  
CCAAAAATGTAATACATTTGTTATCTTTCCACTTTAGCCAAGCAACTCCTGTAATGAGGTGCGAAAC  
TCACTATCACCTTTCTTCATGTTCTTTTCTACCTTTTTTTTTTTTTTTTTGGCAAGCCAGTTCTCACATT  
CCTTACTGTTCCGCATGCATATATCGCTTGTTCTTTAGTGAAATCATTAGCTCAACACTTG-----  
-----  
-----  
-----  
-----  
-----  
-----

CTATGATTTTTTTTTTTTCAATTTCTTCTTCAATTACAGGGACGAATGGTTTTCCACAACCTGTGTAGCATAA  
AGGTTAGTTTGAAAACTAAATGTTCAATTAAGAATCTGGAAATAAACACAAAAAATTATCAACAGG  
AGATTATTTACTTGTGGTACAATAGGGCCAAAGTAATTAGAAAAATGTTGAATGATCCACCACCTTA  
TTTTGTTTTCCACACACTATCTA-









-----  
>MSSY03005913

TTAACCCCTTTGAAGCACACATTAAGGATTTAATTTATTTTTAATTTTTTACAATGAAAACCTTATTTCT  
AAATACATTTAAAATTTAATTTGAGCAAAAATAA--TTTTTC-  
ATTAATATTGAGTGTTGC-----

-----TAAA-  
AAATGGTGGTCATTCAGTGAAACCACTATGCTTCAAAGGGTTAA

>Consensus60

TTAACCCCTTTGAAGCACACATTAAGGATTTAATTTATTTTTAATTTTTTACAATGAAAACCTTATTTCT  
AAATACATTTAAAATTTAATTTGAGCAAAAATAAAATGTTTTCATTAATATTGAGTGTTGCTAAAAAA

TGGTGGTCATT CAGTGAAACCACTATGCAACTAAGCTNCACTATATTTTTACATGGTGTGGTATGCTA  
CAAAGCAATTTTTAGATTCATTGAGACACAATGCCACTTCGCATGTCTTACAAGACCATTTACTTCGG  
TGTGGCTGTAACCTCTGTGCTGCAGTGGGCACAACGTCTGCTTGAACCTCCCTCCTTACAGGTAAATGA  
GCNACCTTGTCAAATCTTTTTCAAGAGGTACTTGAGGCTTGAATAGCTCACTGGCTTTGGAANTGG  
TTTTCTTCTCTAGGTGAAGATTGTGTTGCACCAATCAATCCATCTACTACAGAAATACGAAATTNCT  
TTAGTGATAAATGGGAGCCCTCACTTTAGAGTGCATAAATGACAAAGCCATTTGTCAGTGC AACATCC  
ACAAAGTGCCAAAATATACGGTGCCACCATTTGCGGCTTATTTCTTCCGGCTTATTTCTGTANAGGGA  
TTTTCAACATATCAGCTTTATCCACATAGCCCATGTGCTGGTTGTAATCTTTC ACTAGTTGTGGACAG  
NNTACCATCTGTATTGTTCCATCTTTGTTTTCTCTTGGCTTCAGAAATAAGCGAAGGATTGTGGAA  
ATTGGNCAAAAATGTAATACATTTGTTGTCTTCCACTTTAGCCAAGCAACTCCTGTAAATGANGTGN  
GAACTCACTATCACCTTTCTCATGTTCTTTCTACCTTTTTTTGTTCTTTTGGCAAGCCAGTTCTC  
ACATTCCTTACTGTGCCGCATGCATATATCGCTTGGTTCTTTAGTGAAATCATTAGATCAACACTTGT  
AAAATANTTGTGCAAAATAACATNATGACCCAANCCAAAAGTTCAAAGTNAGNNCTTTGNCAACTC  
GAGCACCTAATAGNTTCTCAATATTGCCNTCAACCTTNCCTNTGTATATNTGAACTGACAGANAAC  
CCCGACTNANCCGCACGCACCCACACCTTGTAGCCTCGTTTTATTGGNTTGTGGGCATANATTGTCT  
GAAAGAACTCCTTCTTTAAATNTGATCATACTTNCATCAATGGACTGATGTTTTCTGGTTTGAAGC  
AGGTTNTGAAAGTCNCTGAAAGTGTATCAAGNATTGGTCNTAGTTTGTAGAGNTTNTCAAANGCATTG  
TCNNTCTTTTTNGCTGNAATACNTTGTGTTTACATGTAATGNGTCAACAACCAACCAAAAACGATT  
CACTGGCATNAGGGGAGAGATAAATGNATCCCTAAGCTGAGGNTNANATGACCAATGGTCCCTNTAGG  
AGGGTAAACGTTTTATCCCCATCATAATGTTTATTNCTATGATTTAAATTTTCATTTCTTCTTCAGTT  
ACAGGGACGAATGGTTTCCCAACTGTGTAGCGTAAAGGTTAGTTTGAAAACTAAATGTTCAATNAA  
AGAATCTGGAAATAAACACAAAAAAGTATCGACAGGAGATTCTGTACTTGTGGTACATTAGGGCCAA  
AGTCATTTGTAAAATTTTGAATGTTCCACCACCTTATTTTGTTTTCCACACACCATCTATTTTTTTT  
AAATCGCTCACTAAGTGTTTCATCATCATCATCATCATCATATTTTATTACNATCTTCTGATTTA  
TATCAGAATAATTTAGGACATTATTGTTATTATTGAAACCGTTATCTTCTGTATAAAAAACANTTGAT  
CTGTCCTCACTTTCTGTAAAGCAATCTTCTAAATCCGAATCACNTTACCTTCCNTCAGAATCACACT  
GTCCATCAATAGAGTCAGTATCACTAGGCACCTTCTANTAGCAAACGTTCAACATCTTCTCTTTGAGT  
NATACGTTTAGCAATTATTTATTTTATTTTATTTTATTTATAGACATGACGACACTGAAATGAGTAA  
AAATATACACATGACCTTACTTGCACAGTGGTAGCAATTTGAAACCACCTAGTAATTAGTTAGATTTA  
TTTAAATATATATATTTAGATAAATTTAATTATGAATGTAATAATTATAAAGCAAAAAACAATAGTA  
TTAAATAATGATTTGAATACTTAGGGCCTACATAGTTATATATTTATTCCTTGAAAAATATAACAAAA  
CCAATTAGAAGAAACGTGTCACCTTCAATAACAAAAACAAAATACATACTATATTGGAGGCATGAATAC  
CAACAAAAATTACTAATAATAAATTTTTACAAGAATAAAACTAGCAAATAAATTCAGATAGATGATTC  
ATAAGTGCTGCCATACAGTTAAATGTATCTCAATAATTAATAAAAAGGTGGTTACCAAGTGAAACCA  
CTATGCTTCAAAGGGTTAA
